# Supplementary material for: Synthesis, structural studies, and photophysical properties of heteroleptic inverse-coordination clusters
Source: Royal Society of Chemistry journal article supplement (doi:10.1039/d2dt02100e), 2022-01-01
Supplement: d2dt02100e1.pdf [file d2dt02100e1.pdf]

**Synthesis, Structural Studies, and Photophysical Properties of Heteroleptic Inverse-Coordination Clusters**

Guan-Rong Huang,<sup>a</sup> Rhone P. Brocha Silalahi,<sup>a</sup> Jian-Hong Liao,<sup>a</sup> Tzu-Hao Chiu,<sup>a</sup> and C. W. Liu<sup>a\*</sup>

<sup>a</sup> Department of Chemistry, National Dong Hwa University No. 1, Sec. 2, Da Hsueh Rd. Shoufeng, Hualien, Taiwan 974301 (R.O.C.) E-mail:chenwei@gms.ndhu.edu.tw

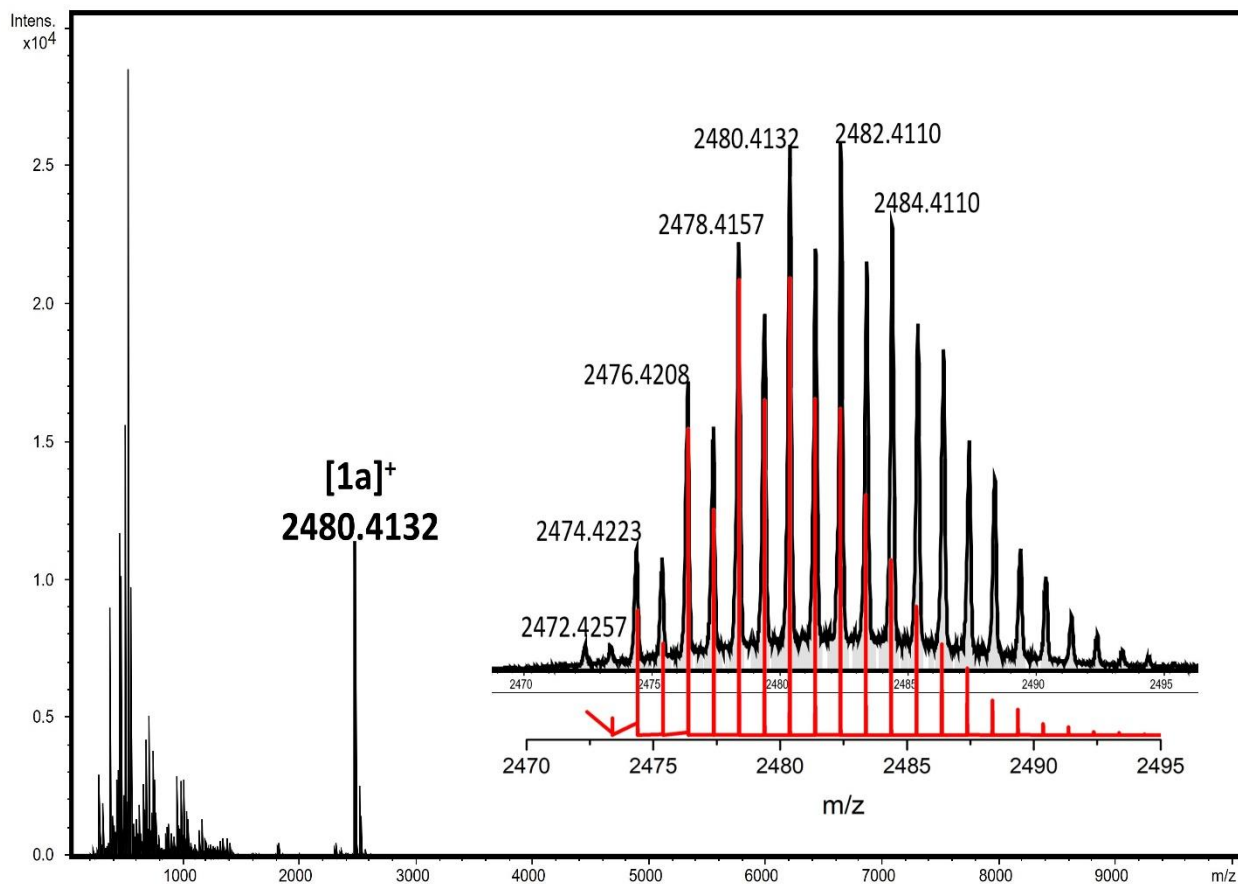

**Figure S1.** ESI-MS spectra of the cluster  $[1a-PF_6]^+$  in positive mode. Inset: Experimental in the top (black) and theoretical one in the bottom (red) of  $[1a-PF_6]^+$ .

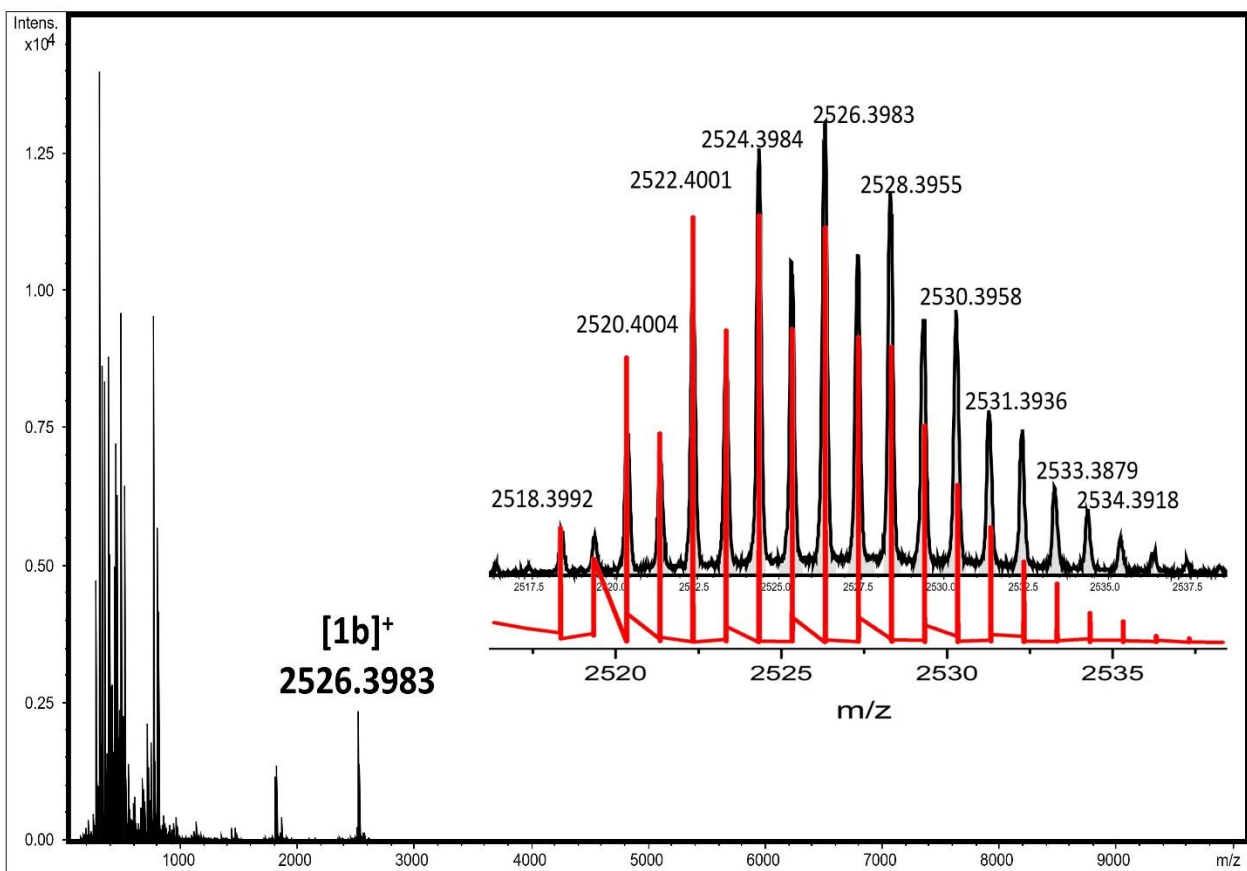

**Figure S2.** ESI-MS spectra of the cluster  $[1b-PF_6]^+$  in positive mode. Inset: Experimental in the top (black) and theoretical one in the bottom (red) of  $[1b-PF_6]^+$ .

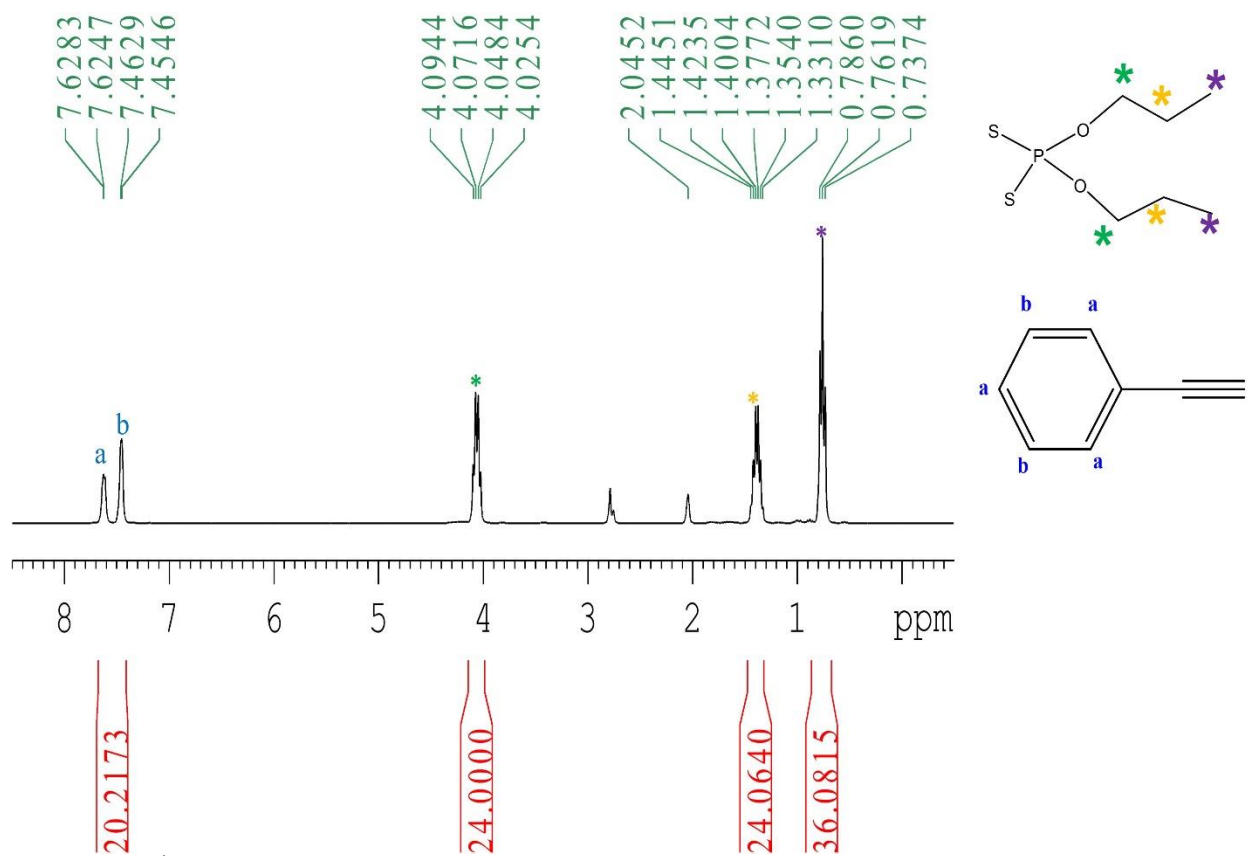

**Figure S3.**  $^1\text{H}$  NMR spectrum of cluster **1a** in  $d_6$ -acetone.

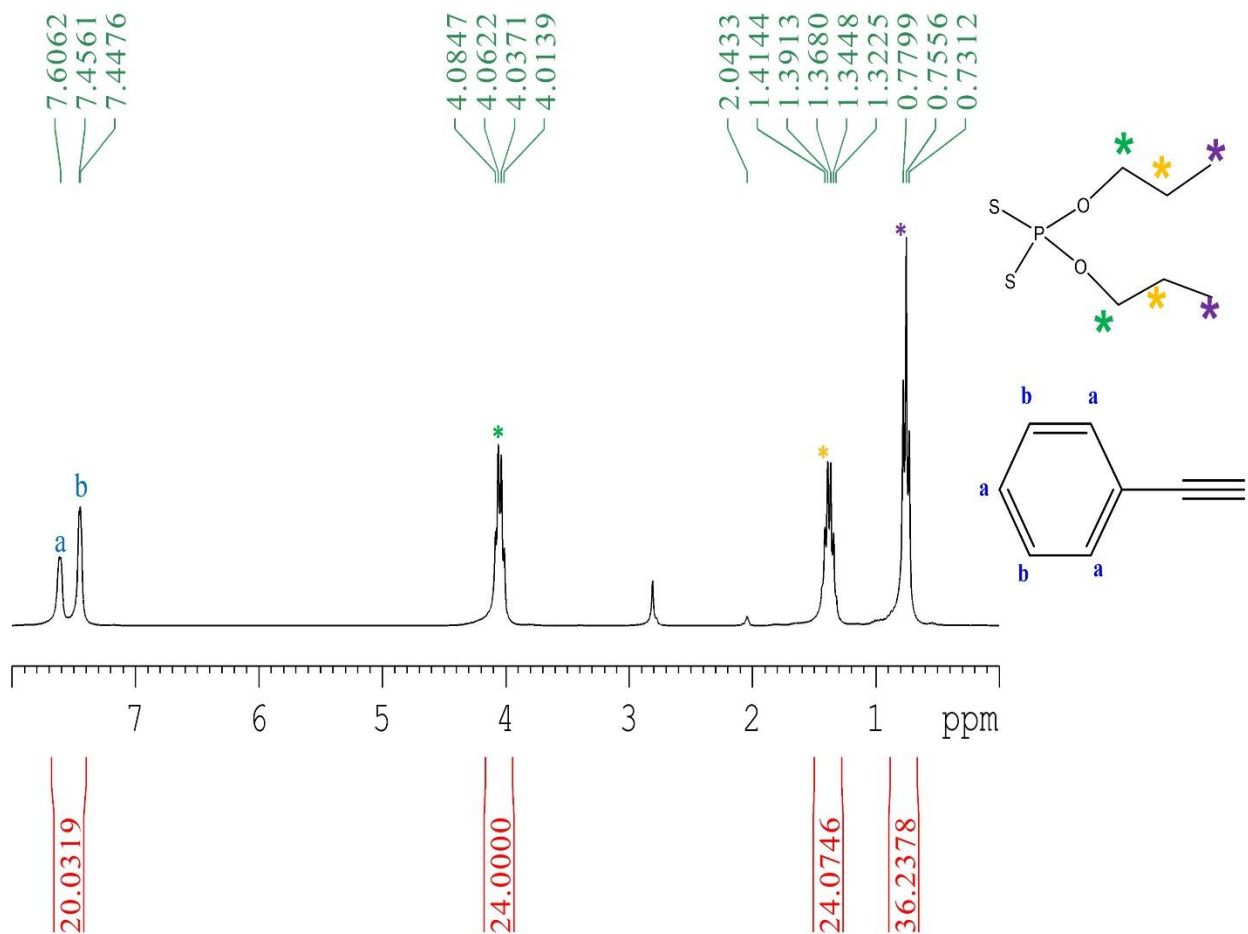

**Figure S4.**  $^1\text{H}$  NMR spectrum of cluster **1b** in  $d_6$ -acetone.

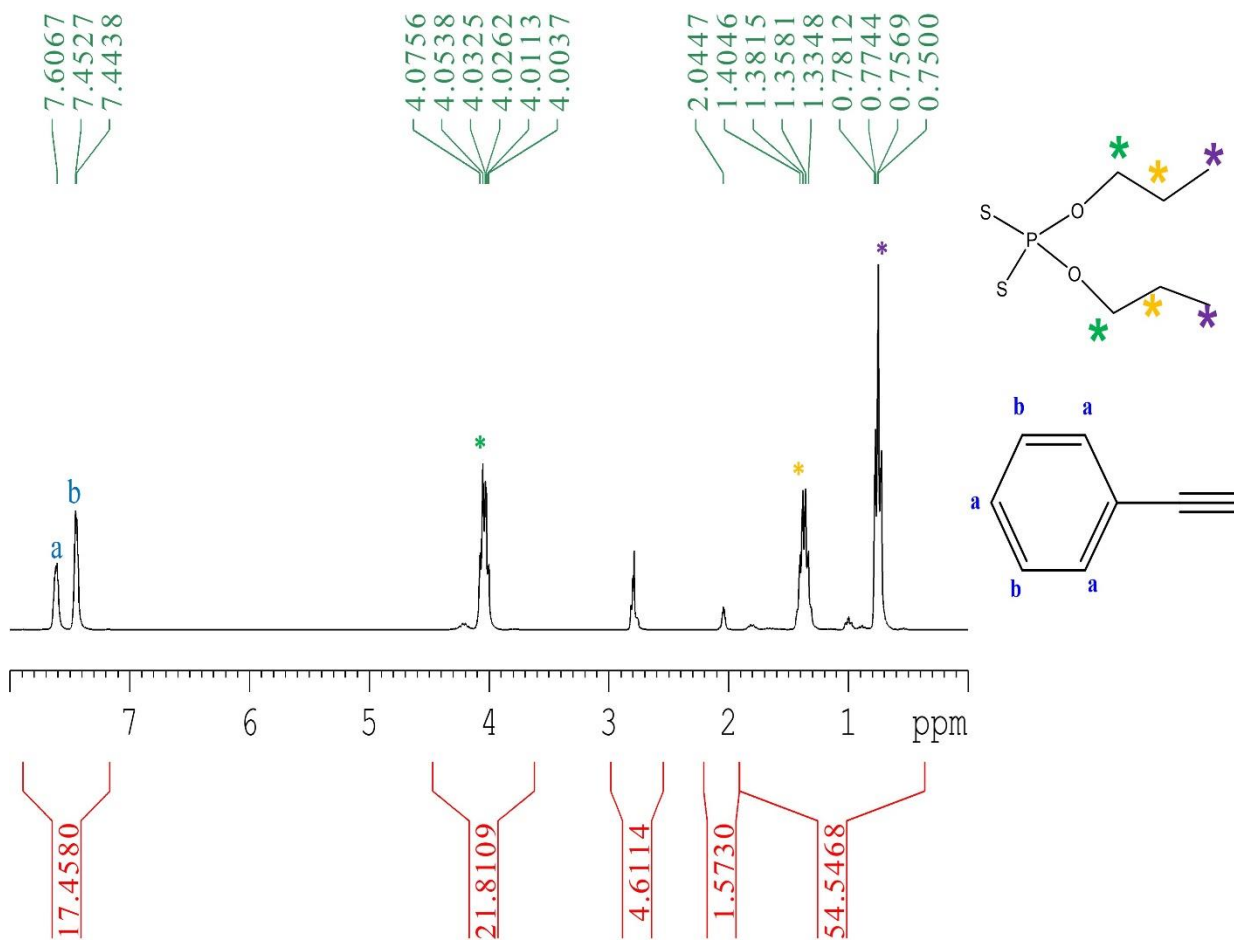

**Figure S5.**  $^1\text{H}$  NMR spectrum of cluster **1c** in  $d_6$ -acetone.

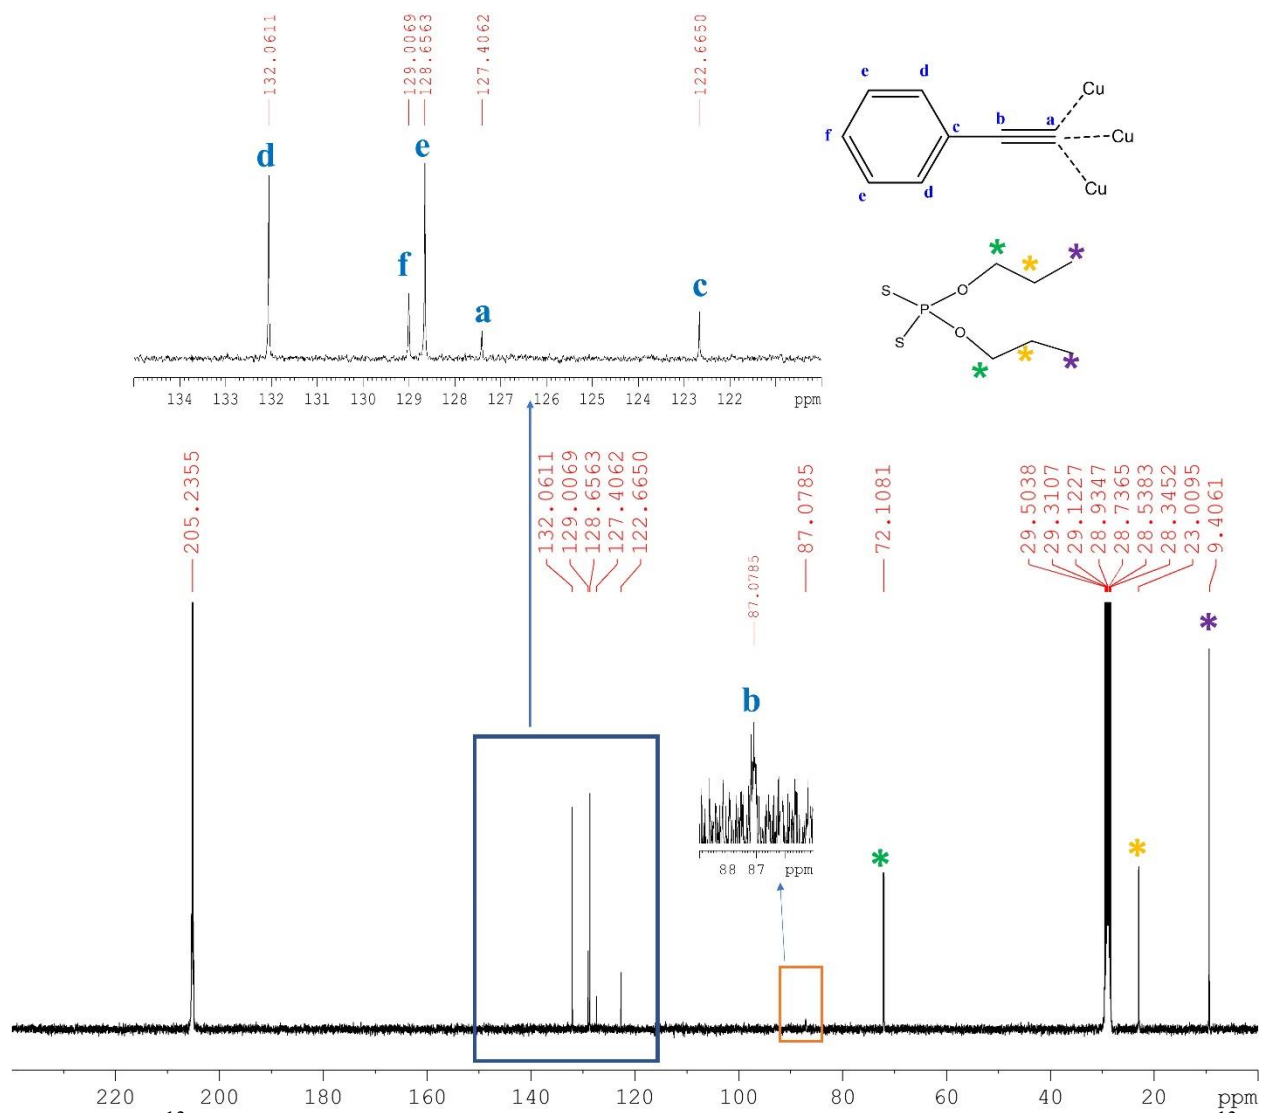

**Figure S6.**  $^{13}\text{C}$  NMR spectrum of cluster **1a** in  $d_6$ -acetone. Inset; the expanded spectra for  $^{13}\text{C}$  NMR of phenyl rings. The (\*, \*, and \*) highlighted are the  $^{13}\text{C}$  NMR of the  $i$ Pr alkyl group in the dithiophosphate ligand.

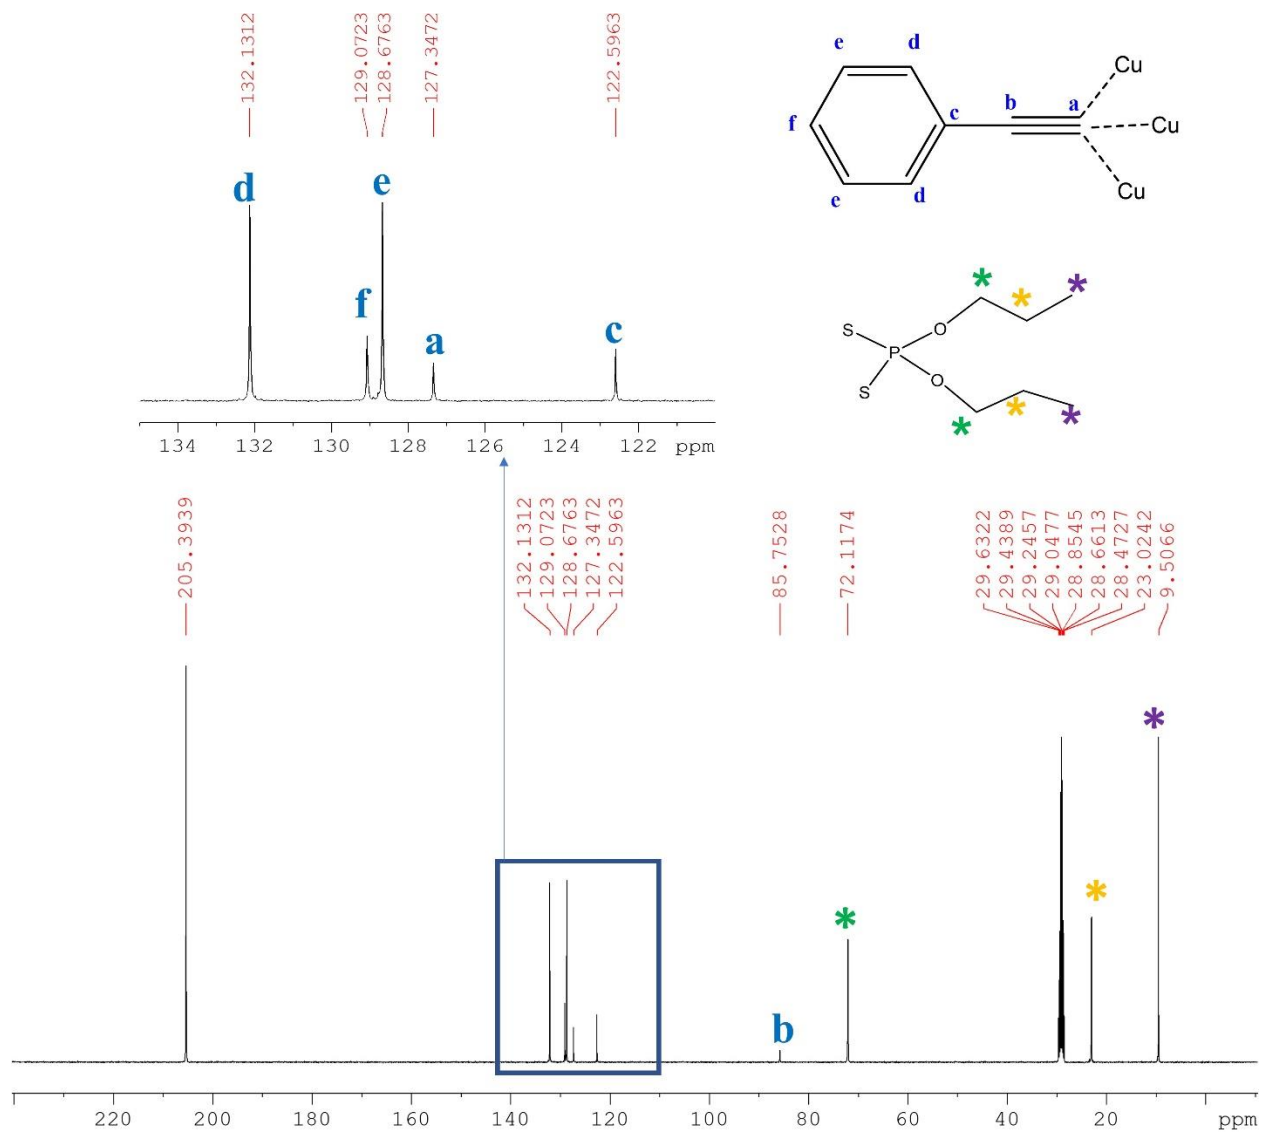

**Figure S7.**  $^{13}\text{C}$  NMR spectrum of cluster **1b** in  $d_6$ -acetone. Inset; the expanded spectra for  $^{13}\text{C}$  NMR of phenyl rings. The (\*, \*, and \*) highlighted are the  $^{13}\text{C}$  NMR of the  $^i\text{Pr}$  alkyl group in the dithiophosphate ligand.



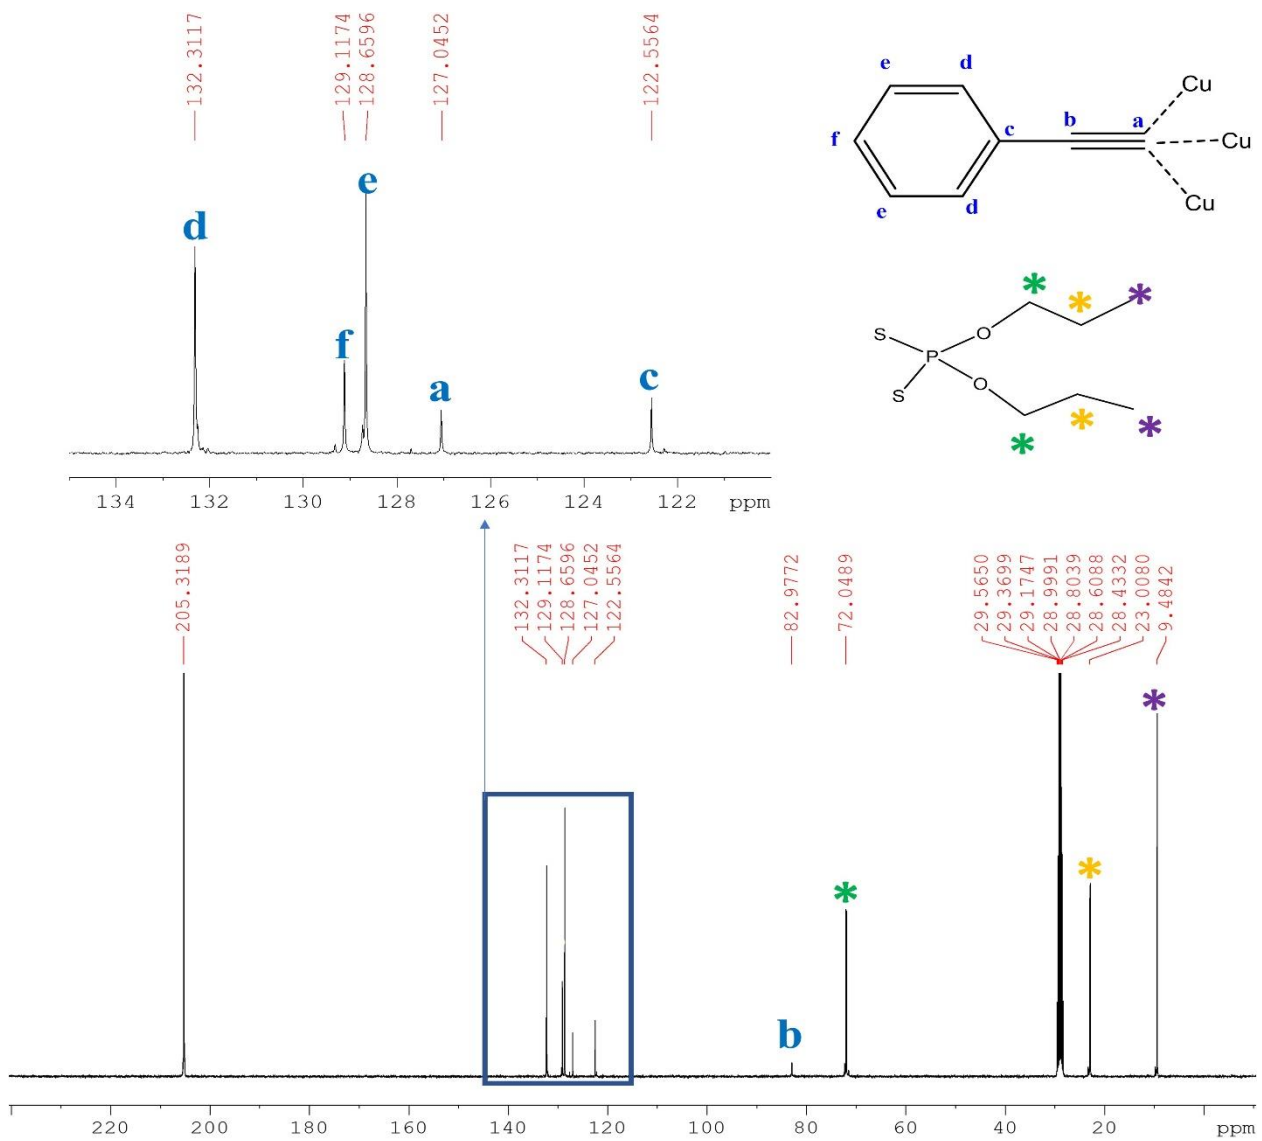

**Figure S8.**  $^{13}\text{C}$  NMR spectrum of cluster **1c** in  $d_6$ -acetone. Inset; the expanded spectra for  $^{13}\text{C}$  NMR of phenyl rings. The (\*, \*, and \*) highlighted are the  $^{13}\text{C}$  NMR of the *i*Pr alkyl group in the dithiophosphate ligand.

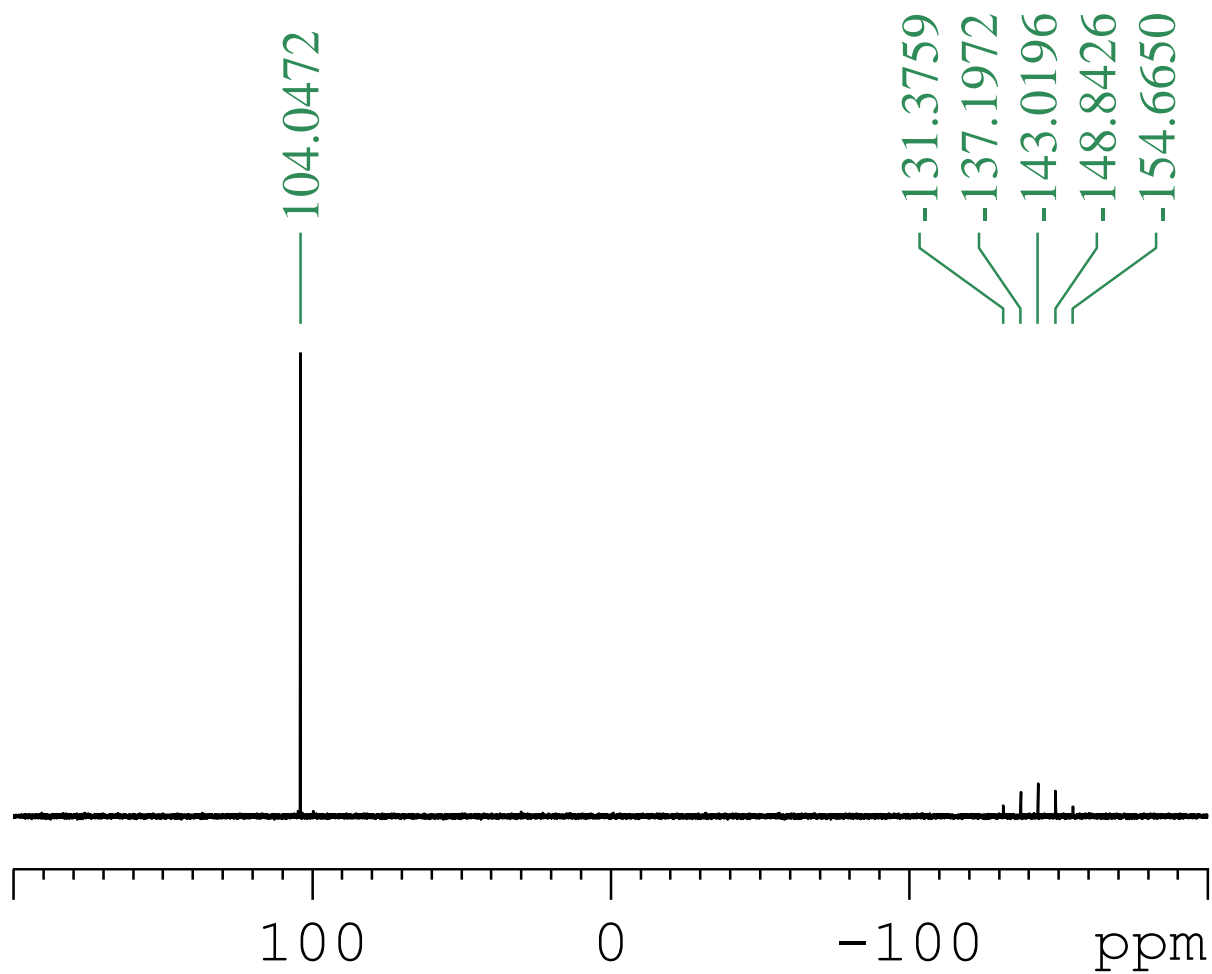

**Figure S9.**  $^{31}\text{P}\{^1\text{H}\}$  NMR spectrum of cluster **1a** in  $d_6$ -acetone.

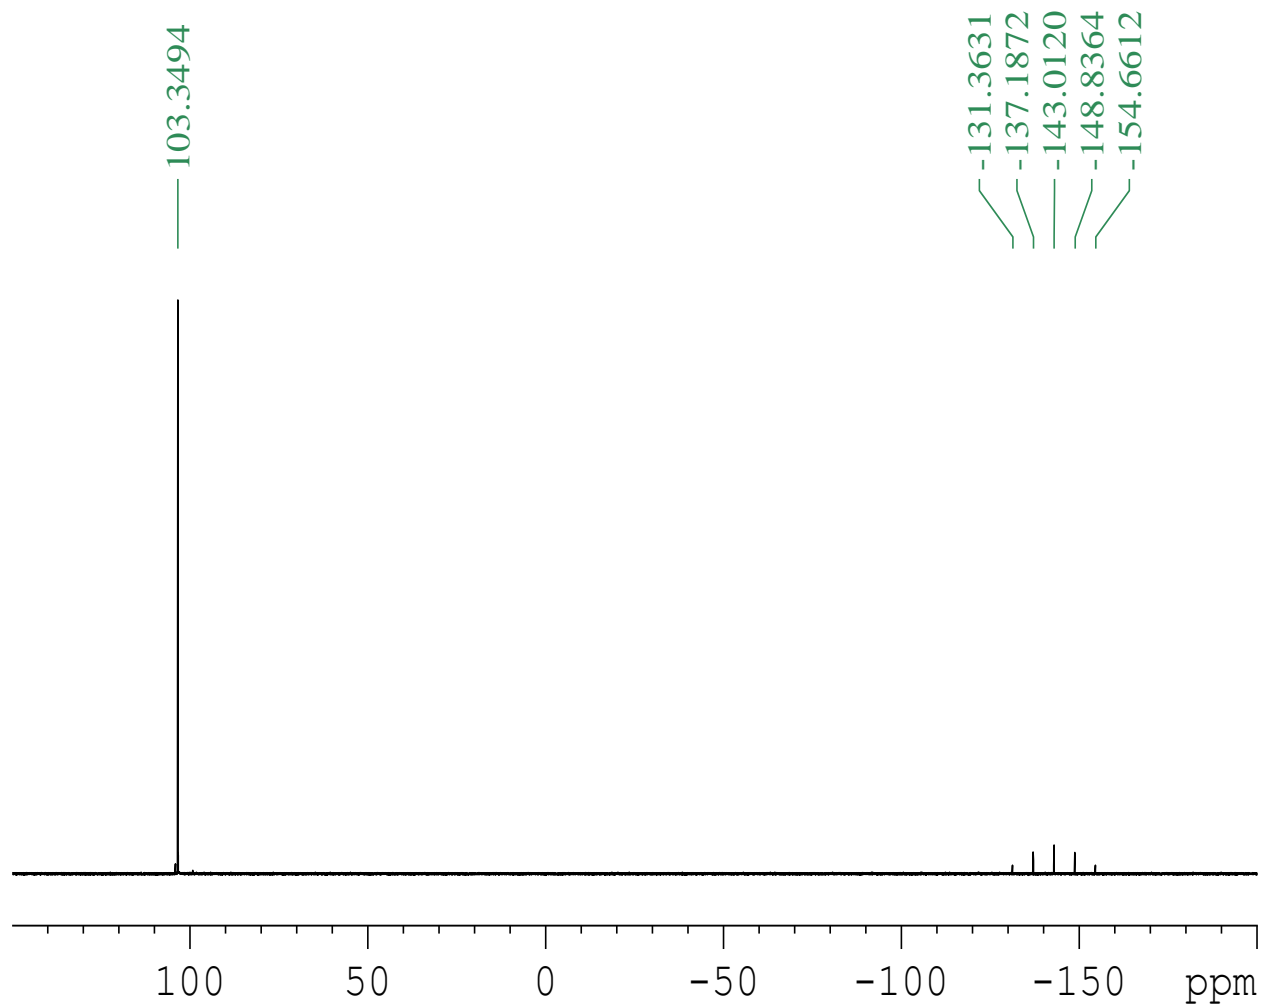

**Figure S10.**  $^{31}\text{P}\{^1\text{H}\}$  NMR spectrum of cluster **1b** in  $d_6$ -acetone.

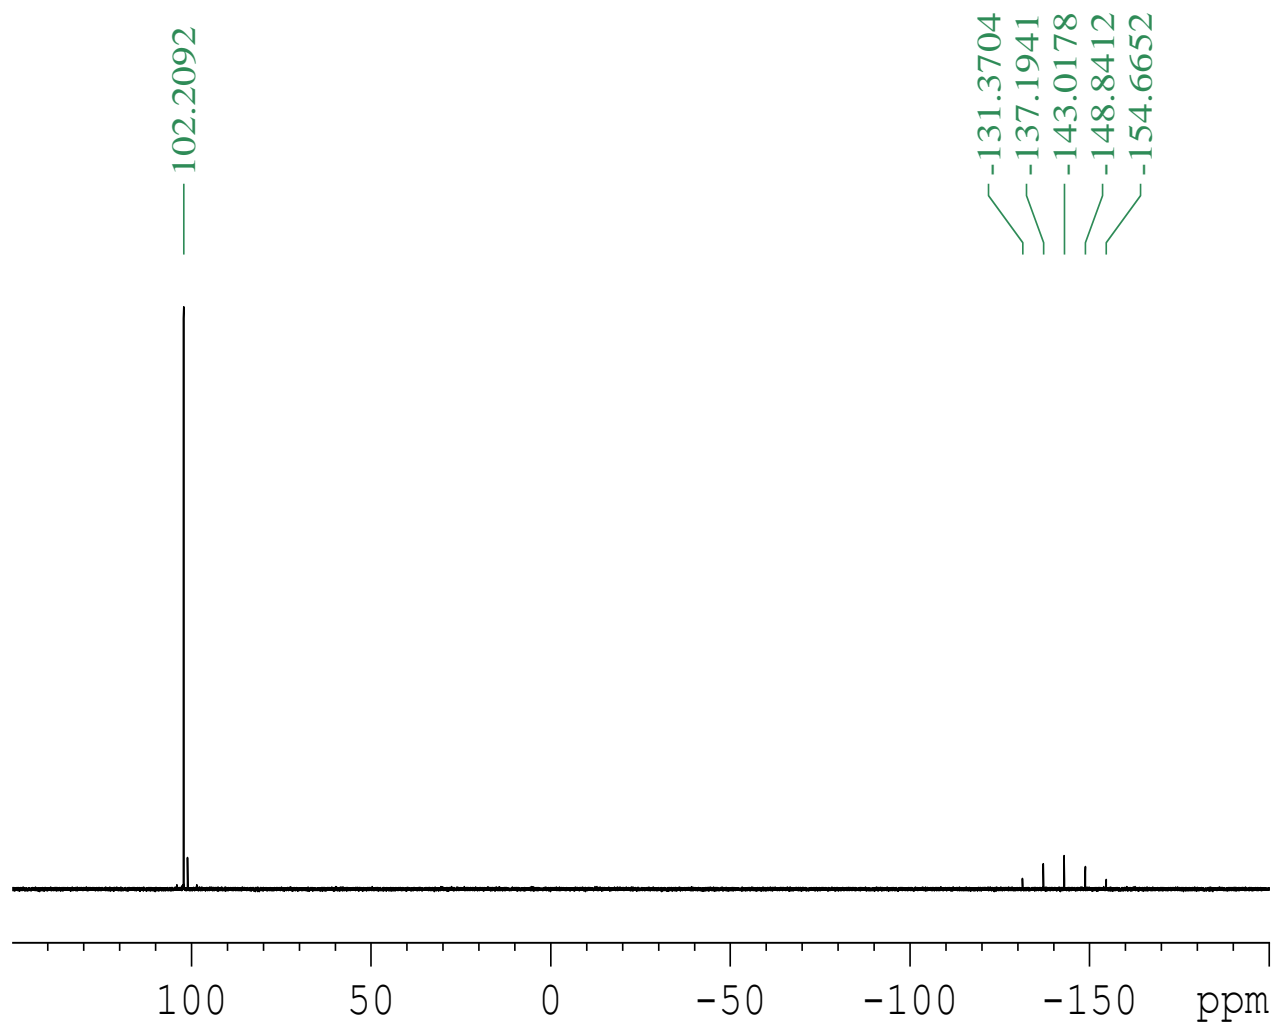

**Figure S11.**  $^{31}\text{P}\{^1\text{H}\}$  NMR spectrum of cluster **1c** in  $d_6$ -acetone.

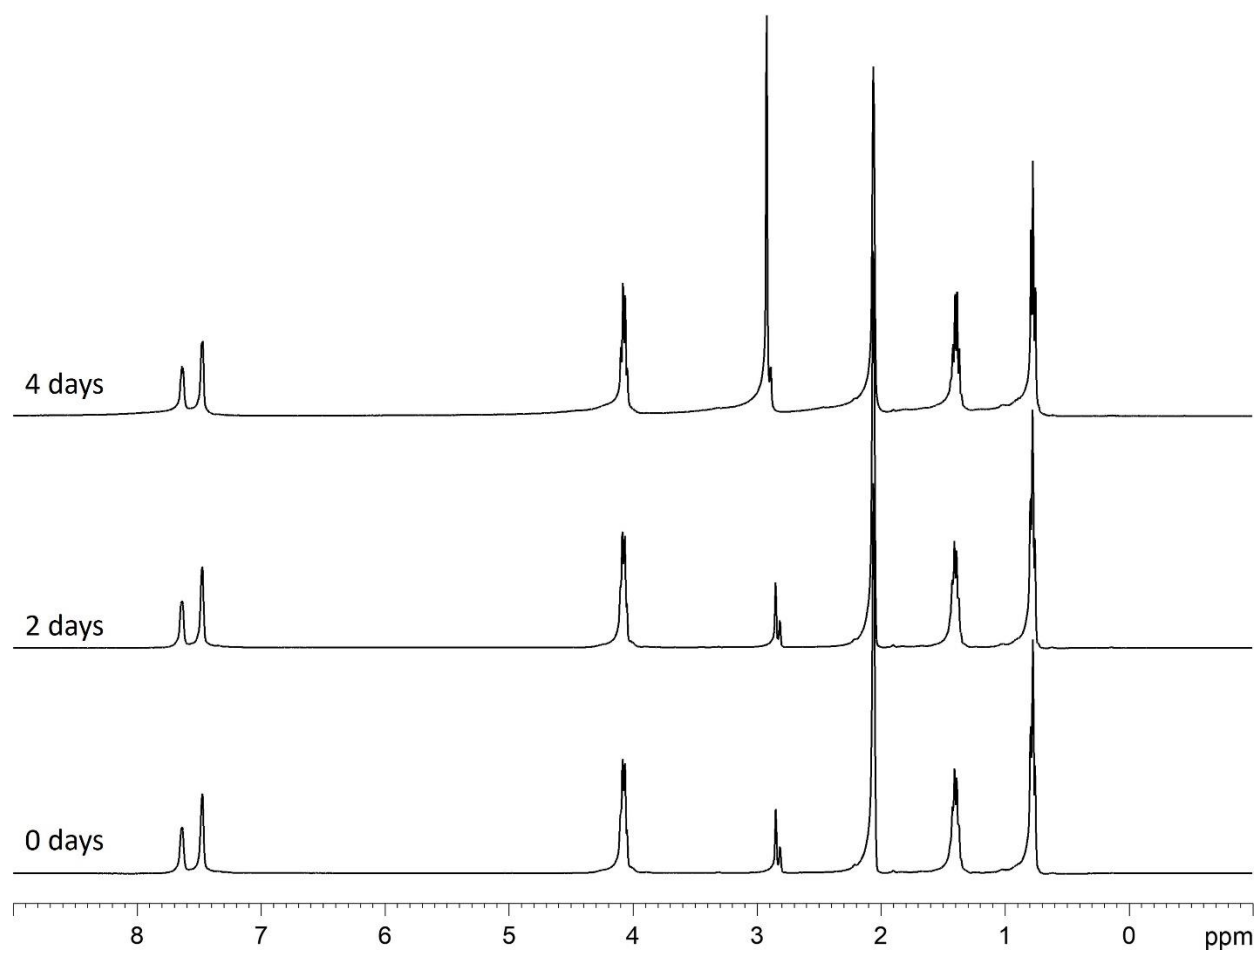

**Figure S12.** Time-dependent  $^1\text{H}$  NMR spectrum of cluster **1a** in  $d_6$ -acetone.

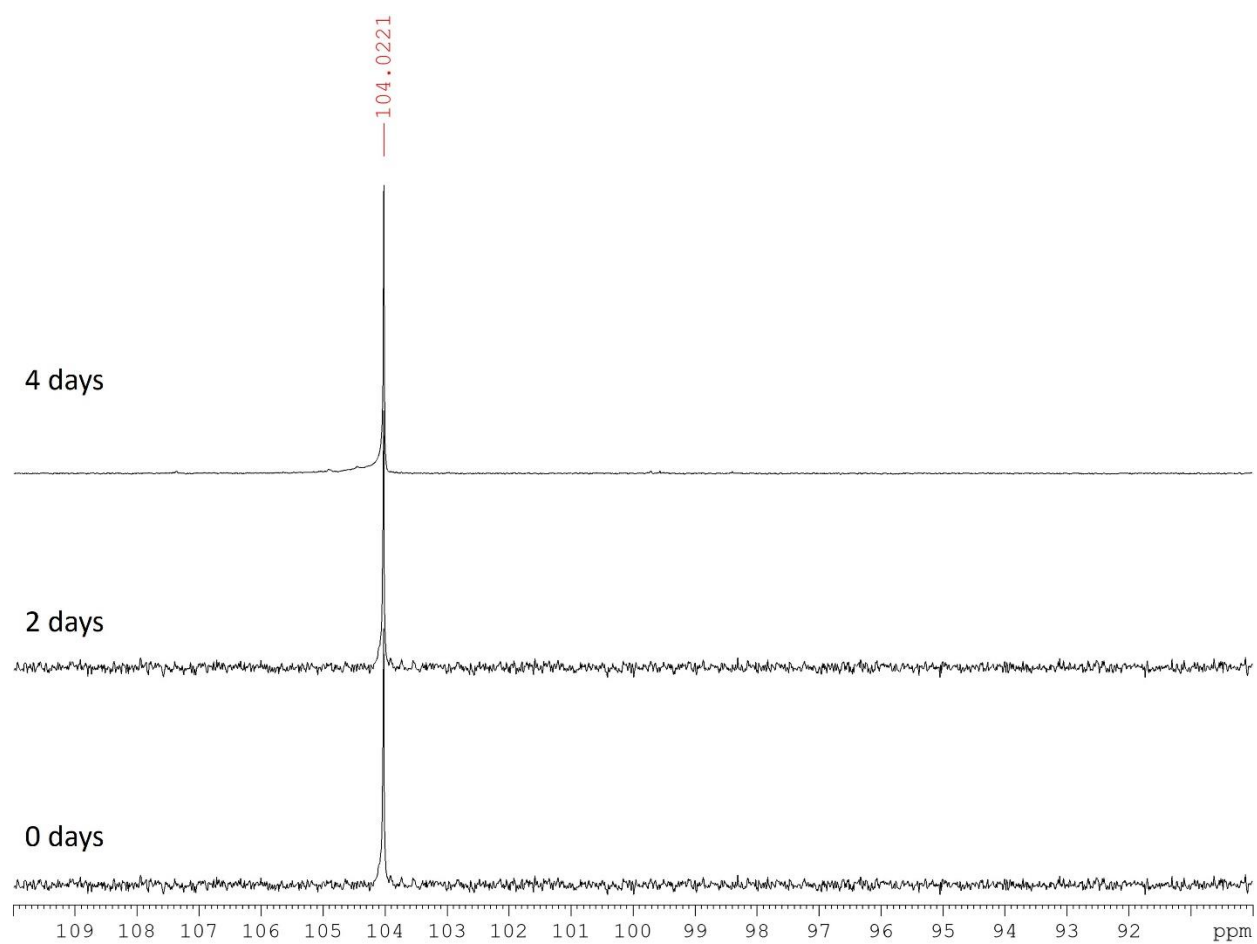

**Figure S13.** Time-dependent  $^{31}\text{P}\{^1\text{H}\}$  NMR spectrum of cluster **1a** in  $d_6$ -acetone.

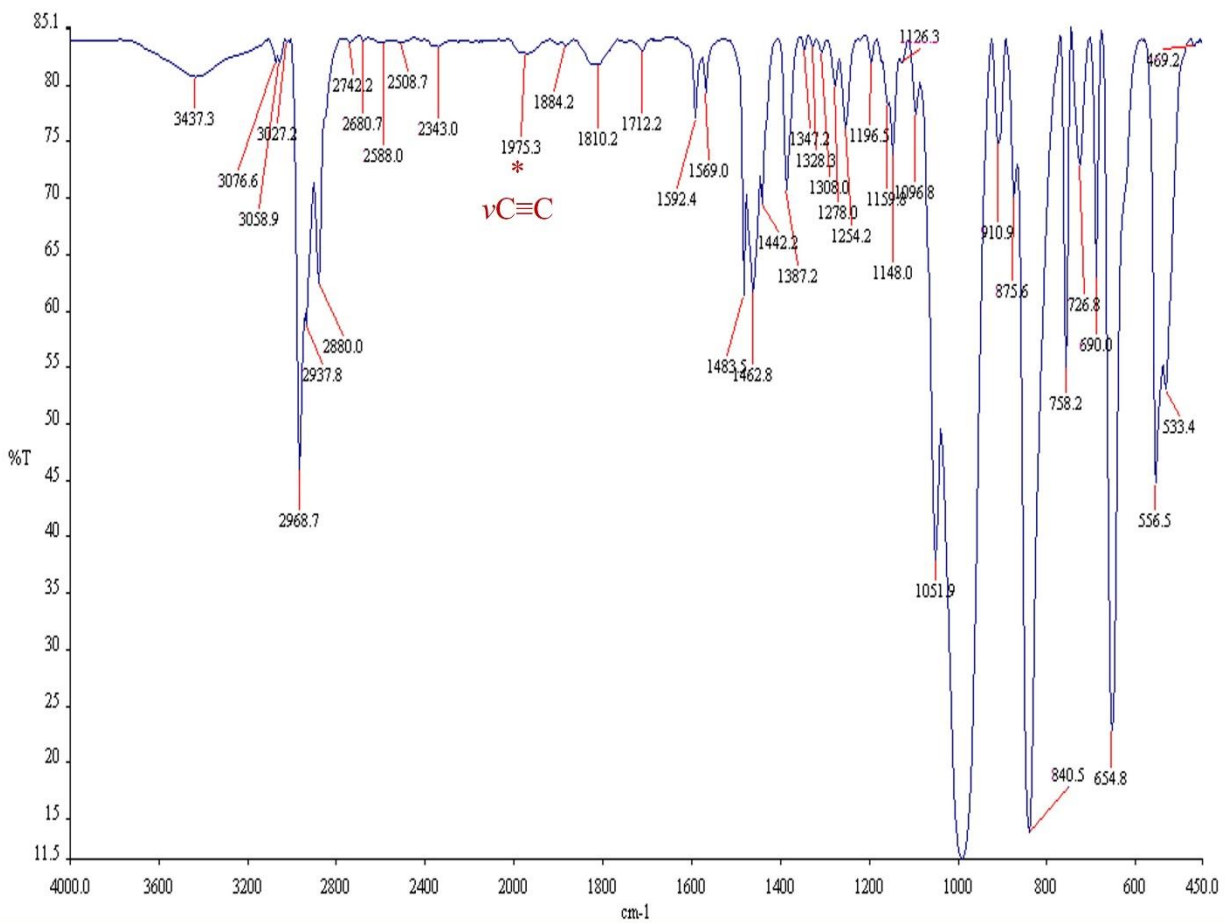

Figure S14. FT-IR spectrum of cluster 1a.

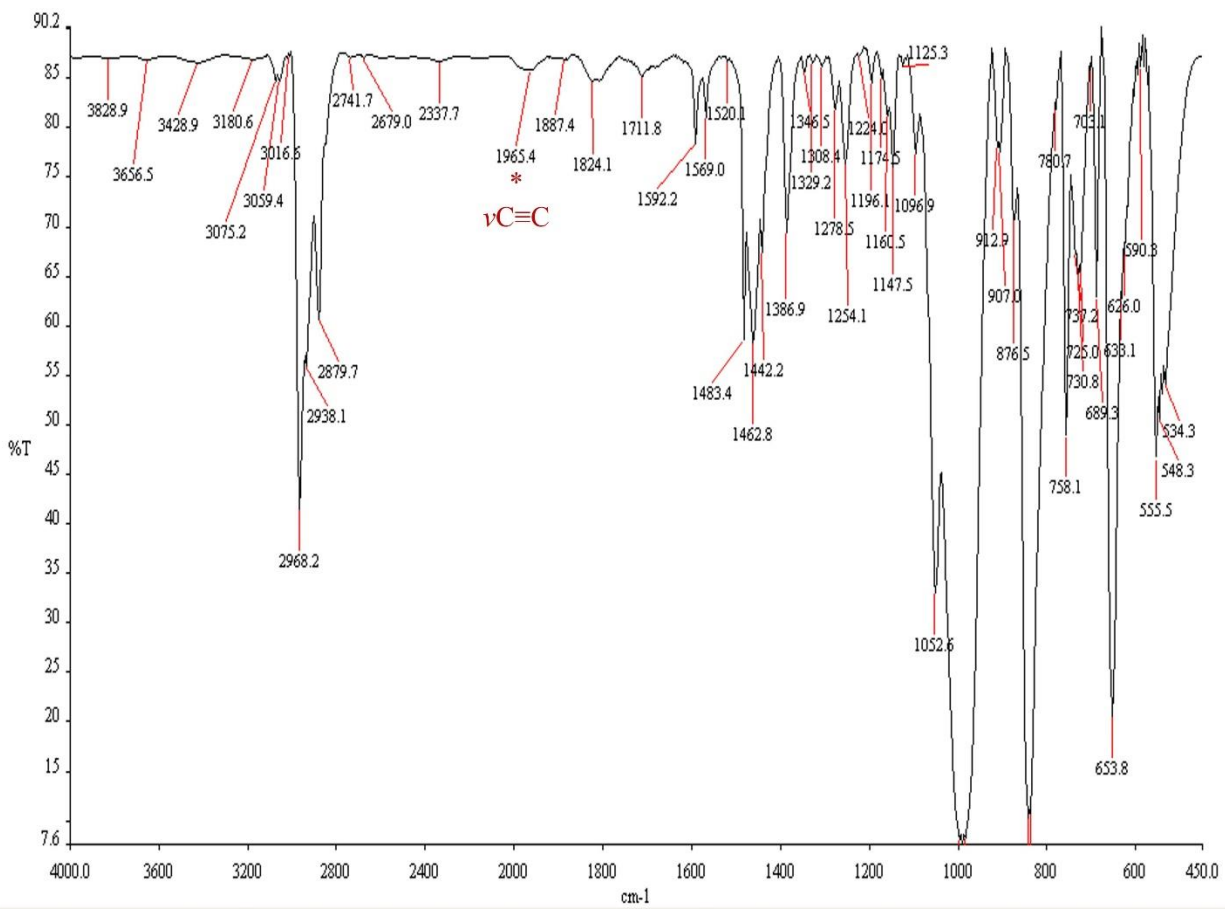

Figure S15. FT-IR spectrum of cluster 1b.



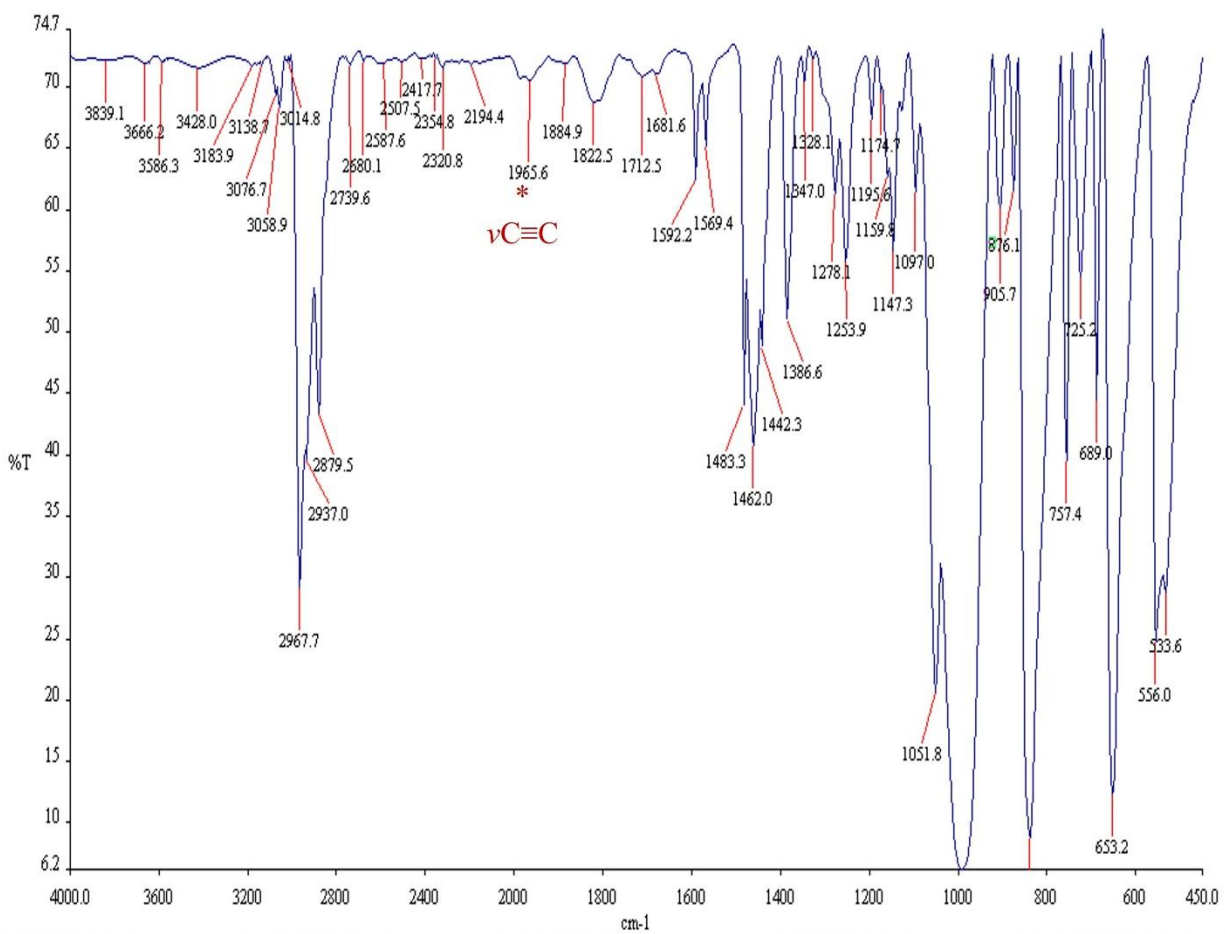

Figure S16. FT-IR spectrum of cluster 1c.

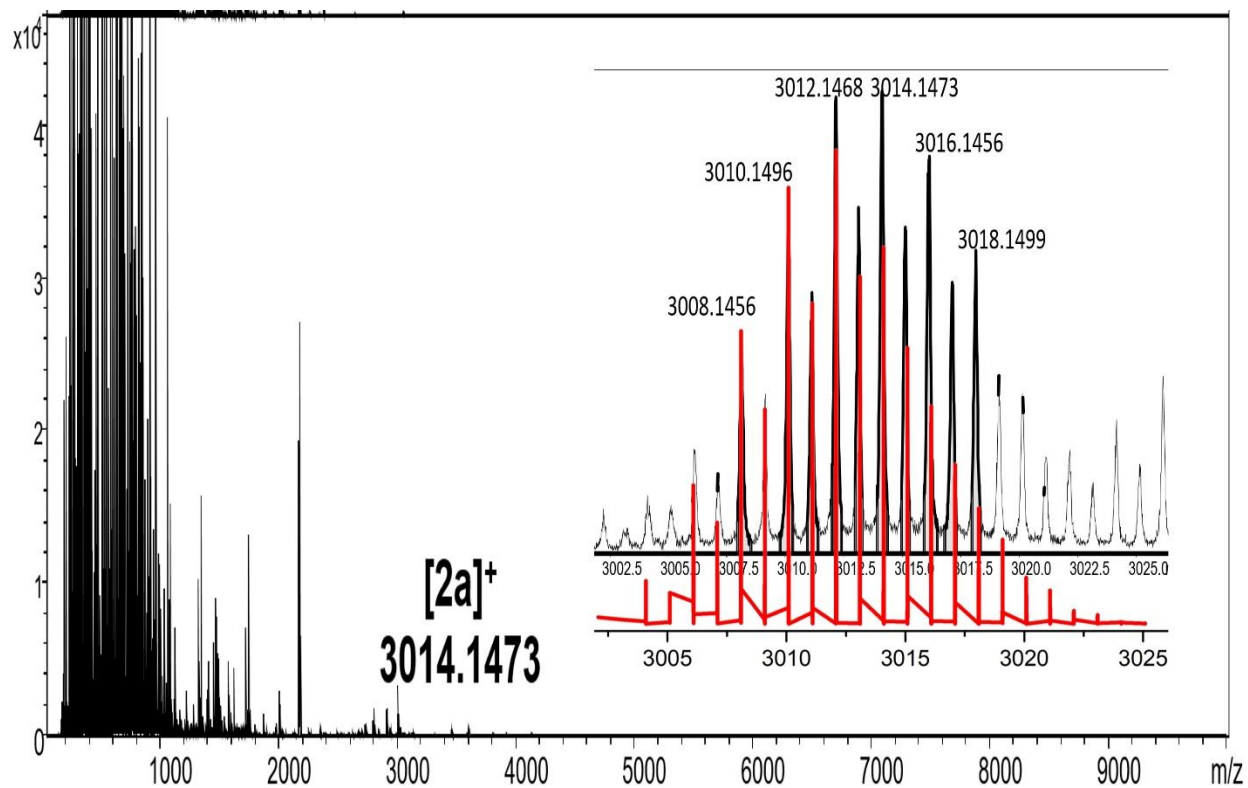

**Figure S17.** ESI-MS spectra of the cluster  $[2a-PF_6]^+$  in positive mode. Inset: Experimental in the top (black) and theoretical one in the bottom (red) of  $[2a-PF_6]^+$ .

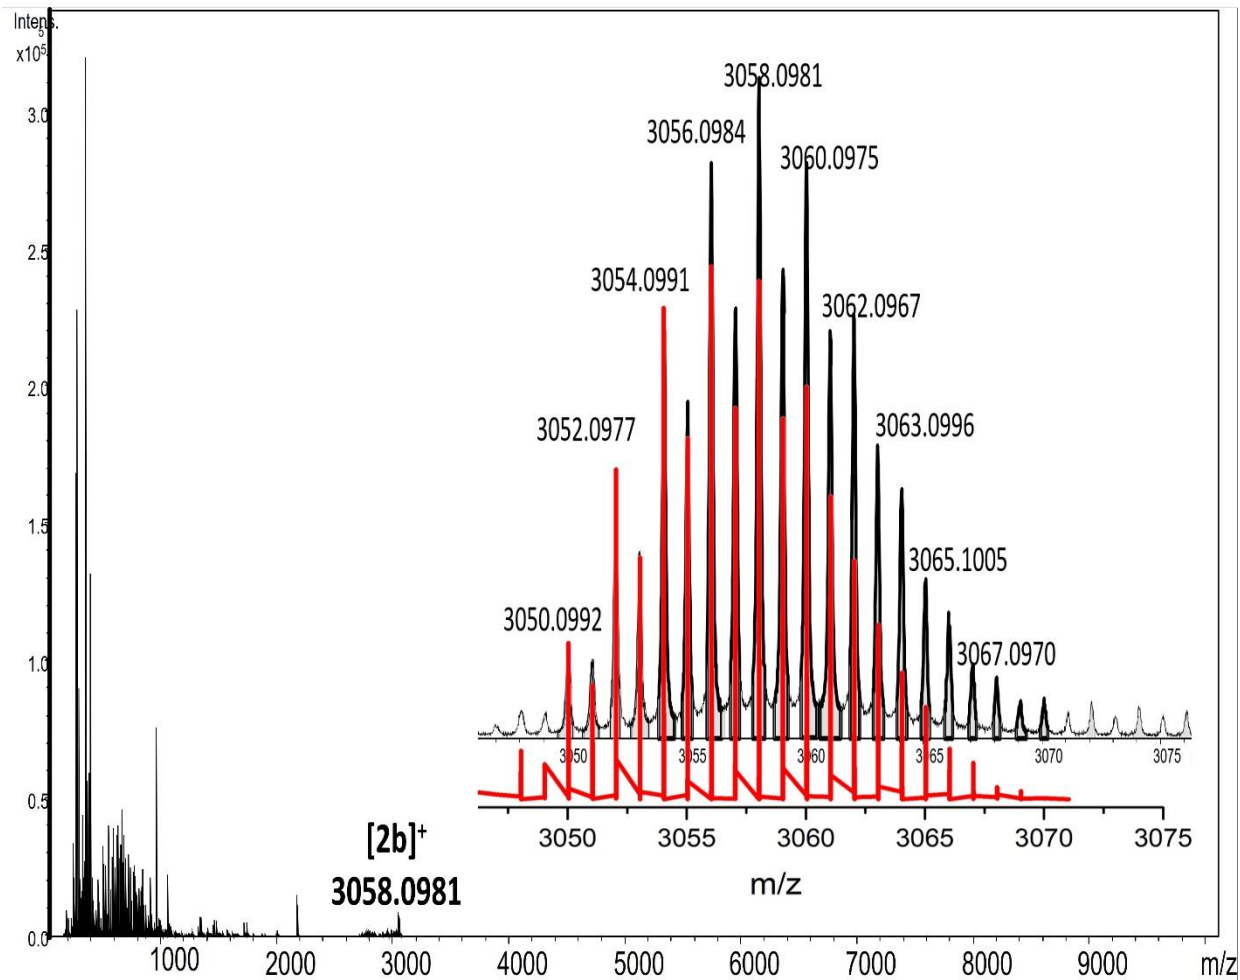

**Figure S18.** ESI-MS spectra of the cluster  $[2b-PF_6]^+$  in positive mode. Inset: Experimental in the top (black) and theoretical one in the bottom (red) of  $[2b-PF_6]^+$ .

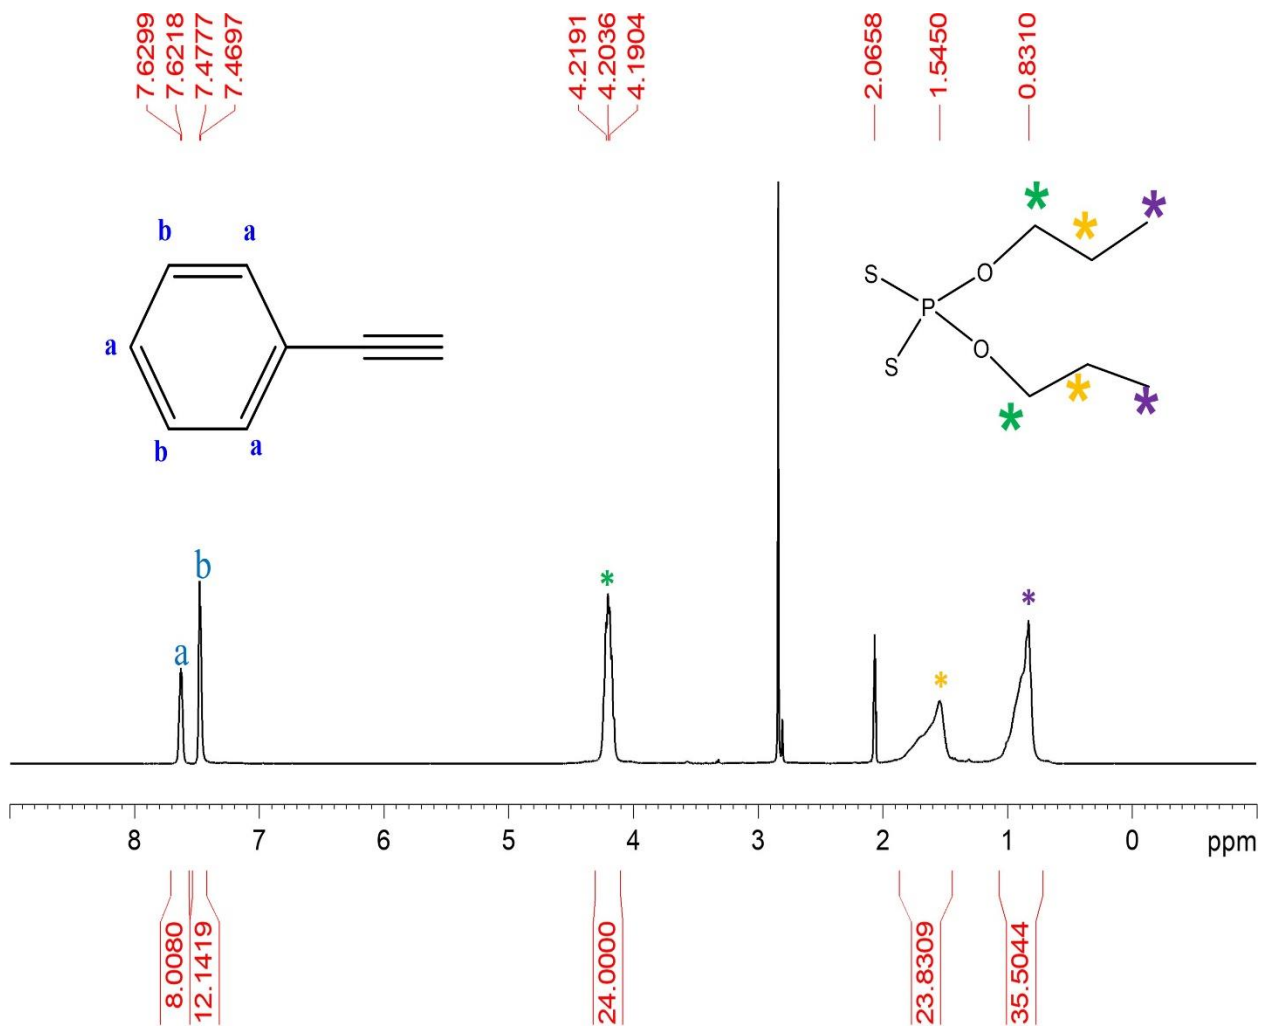

**Figure S19.**  $^1\text{H}$  NMR spectrum of cluster **2a** in  $d_6$ -acetone.

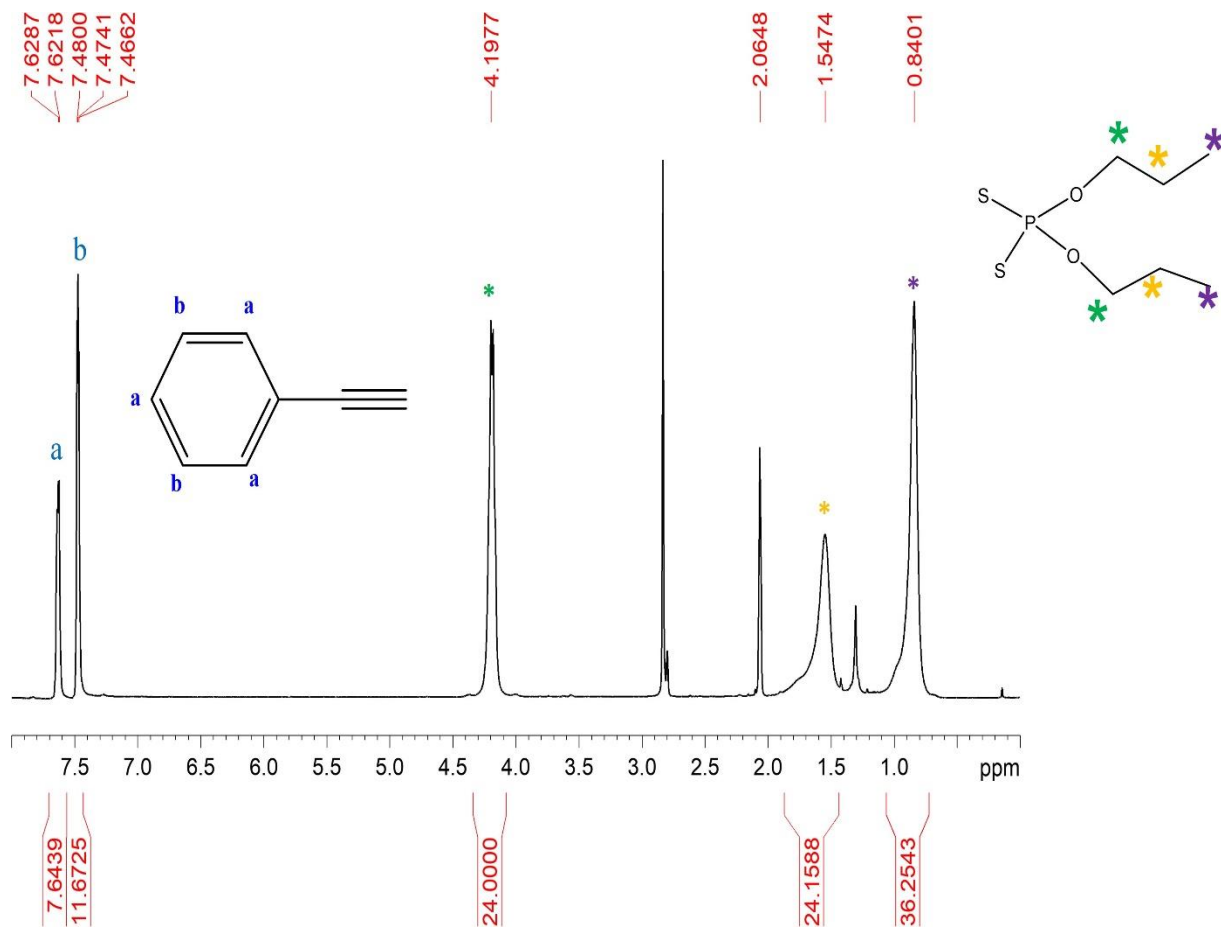

**Figure S20.**  $^1\text{H}$  NMR spectrum of cluster **2b** in  $d_6$ -acetone.

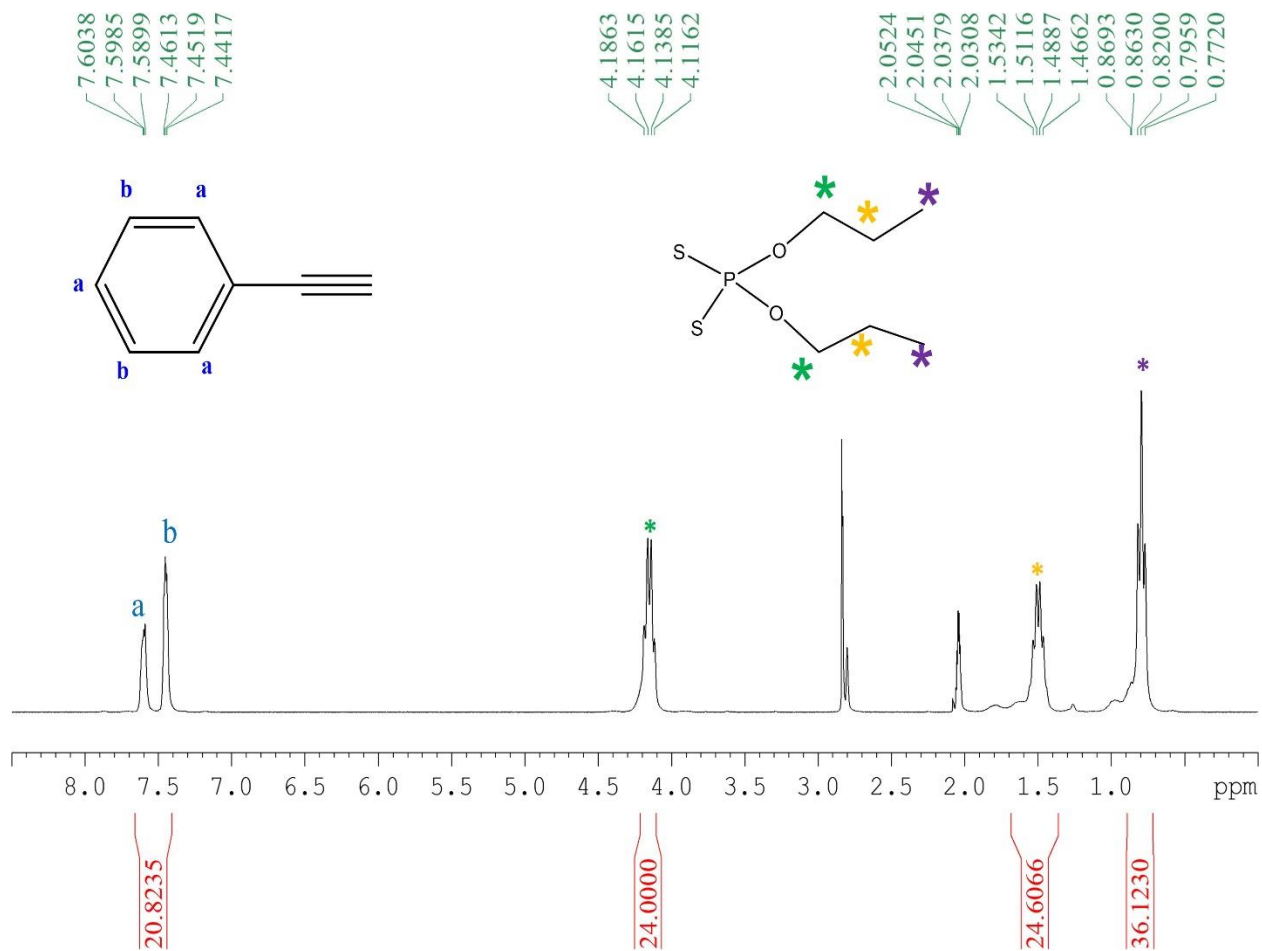

**Figure S21.**  $^1\text{H}$  NMR spectrum of cluster **2c** in  $d_6$ -acetone.

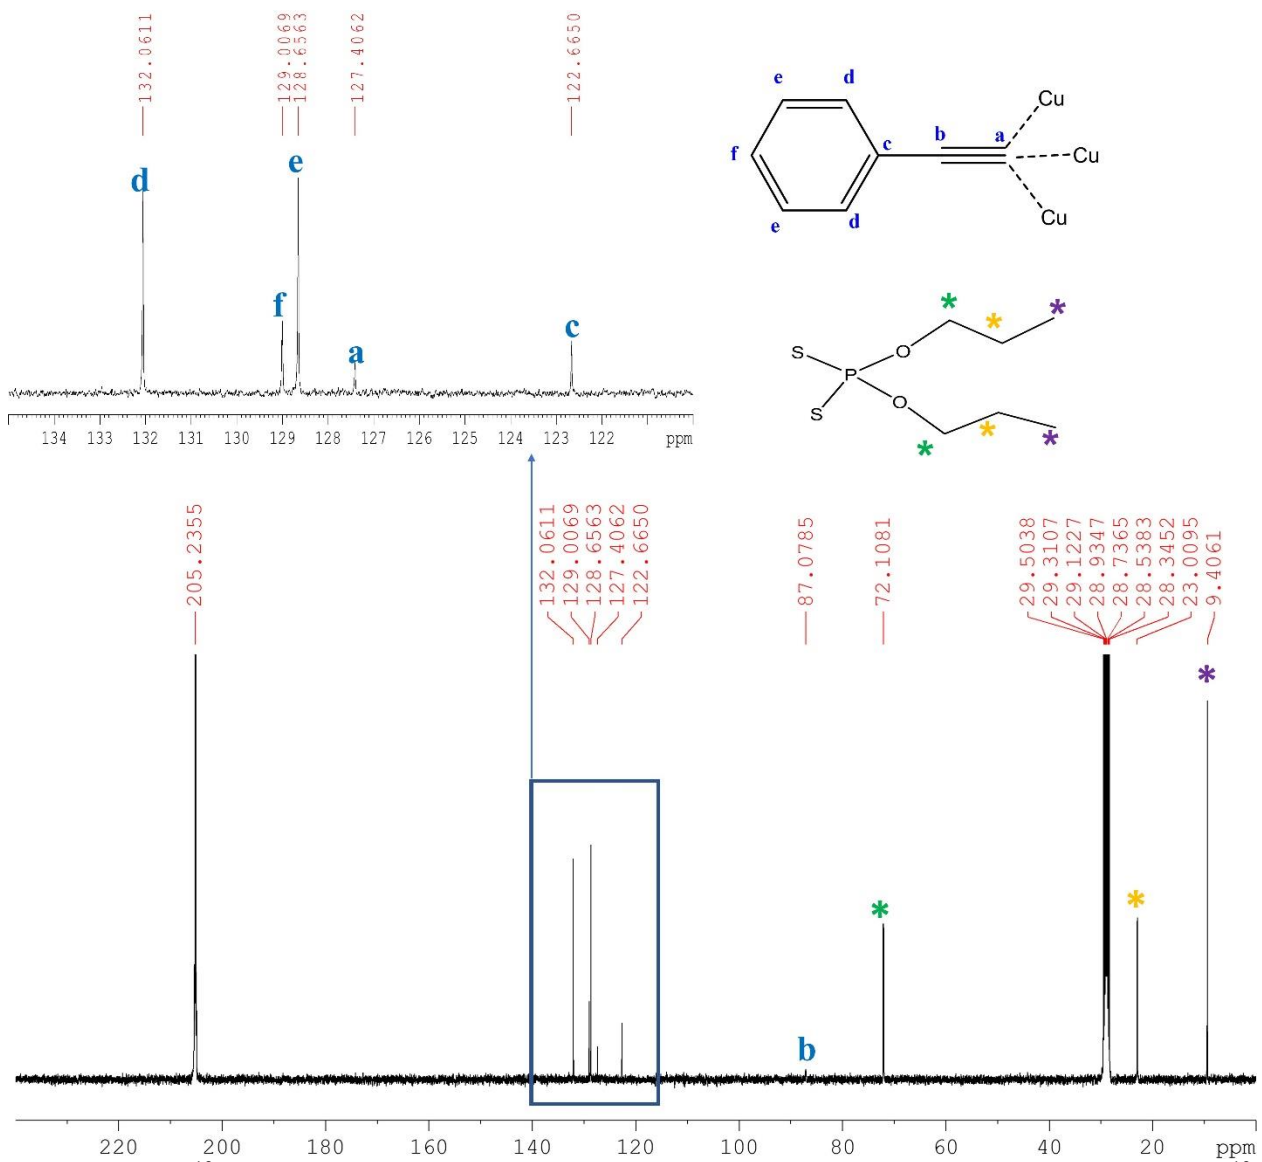

**Figure S22.**  $^{13}\text{C}$  NMR spectrum of cluster **2a** in  $d_6$ -acetone. Inset; the expanded spectra for  $^{13}\text{C}$  NMR of phenyl rings. The (\*, \*, and \*) highlighted are the  $^{13}\text{C}$  NMR of the  $i\text{Pr}$  alkyl group in the dithiophosphate ligand.

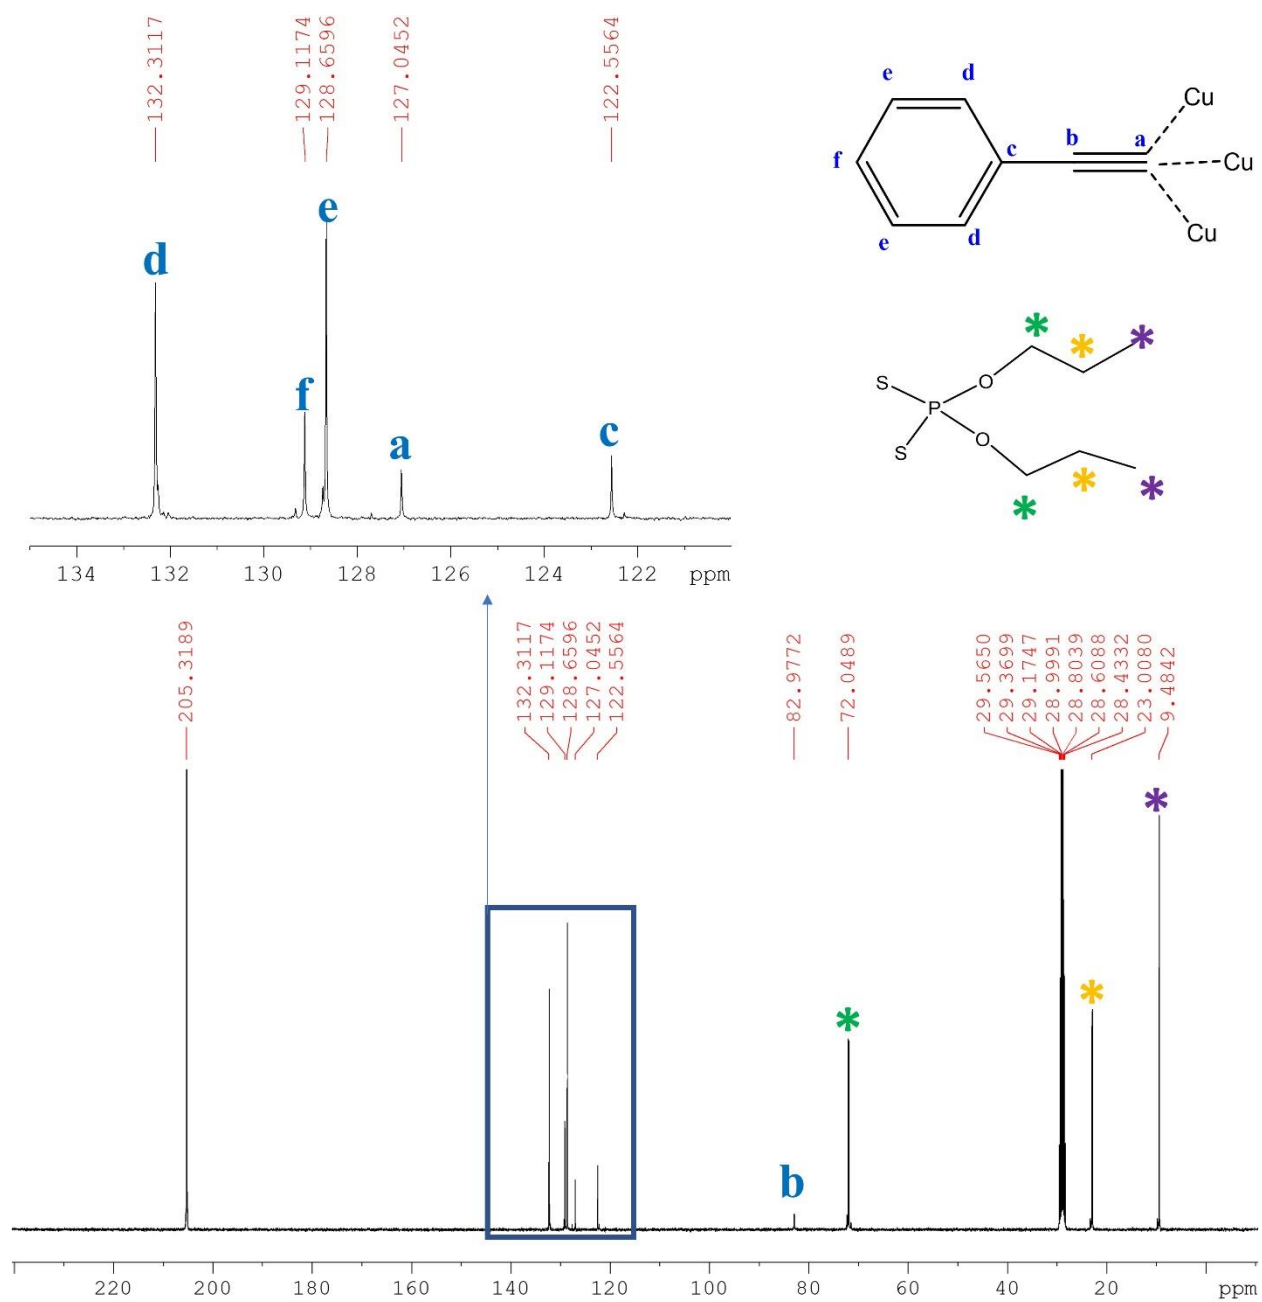

**Figure S23.**  $^{13}\text{C}$  NMR spectrum of cluster **2b** in  $d_6$ -acetone. Inset; the expanded spectra for  $^{13}\text{C}$  NMR of phenyl rings. The (\*, \*, and \*) highlighted are the  $^{13}\text{C}$  NMR of the *i*Pr alkyl group in the dithiophosphate ligand.



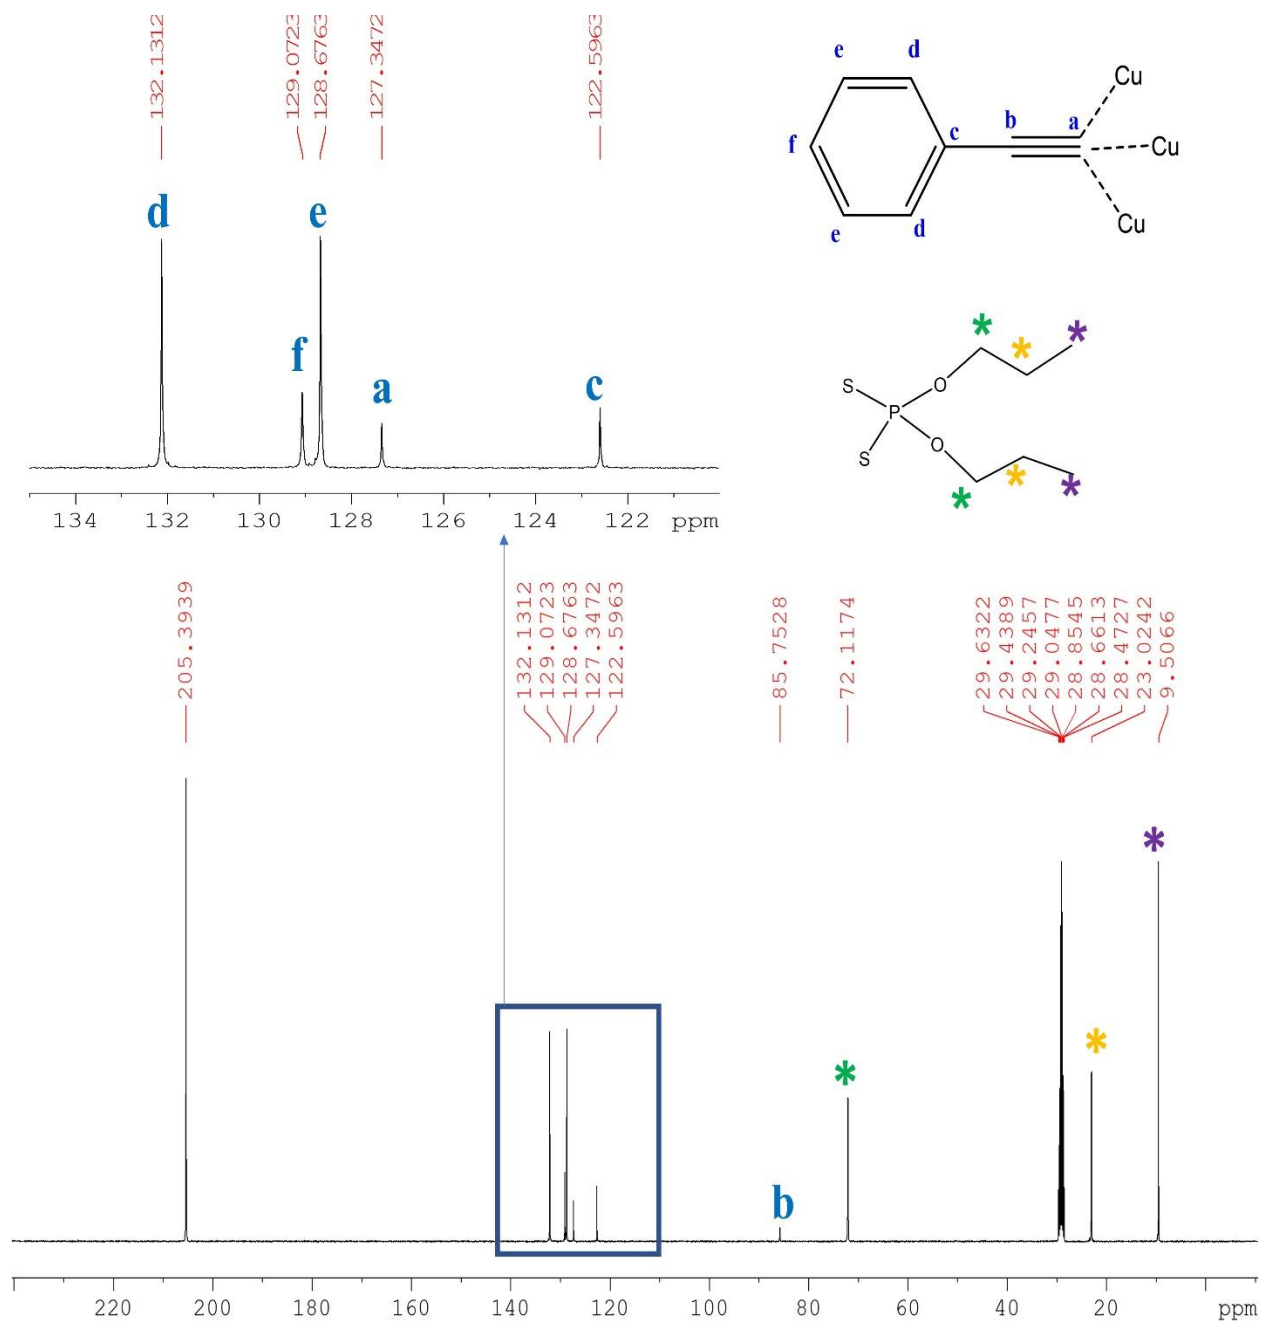

**Figure S24.**  $^{13}\text{C}$  NMR spectrum of cluster **2c** in  $d_6$ -acetone. . Inset; the expanded spectra for  $^{13}\text{C}$  NMR of phenyl rings. The (\*, \*, and \*) highlighted are the  $^{13}\text{C}$  NMR of the *i*Pr alkyl group in the dithiophosphate ligand.

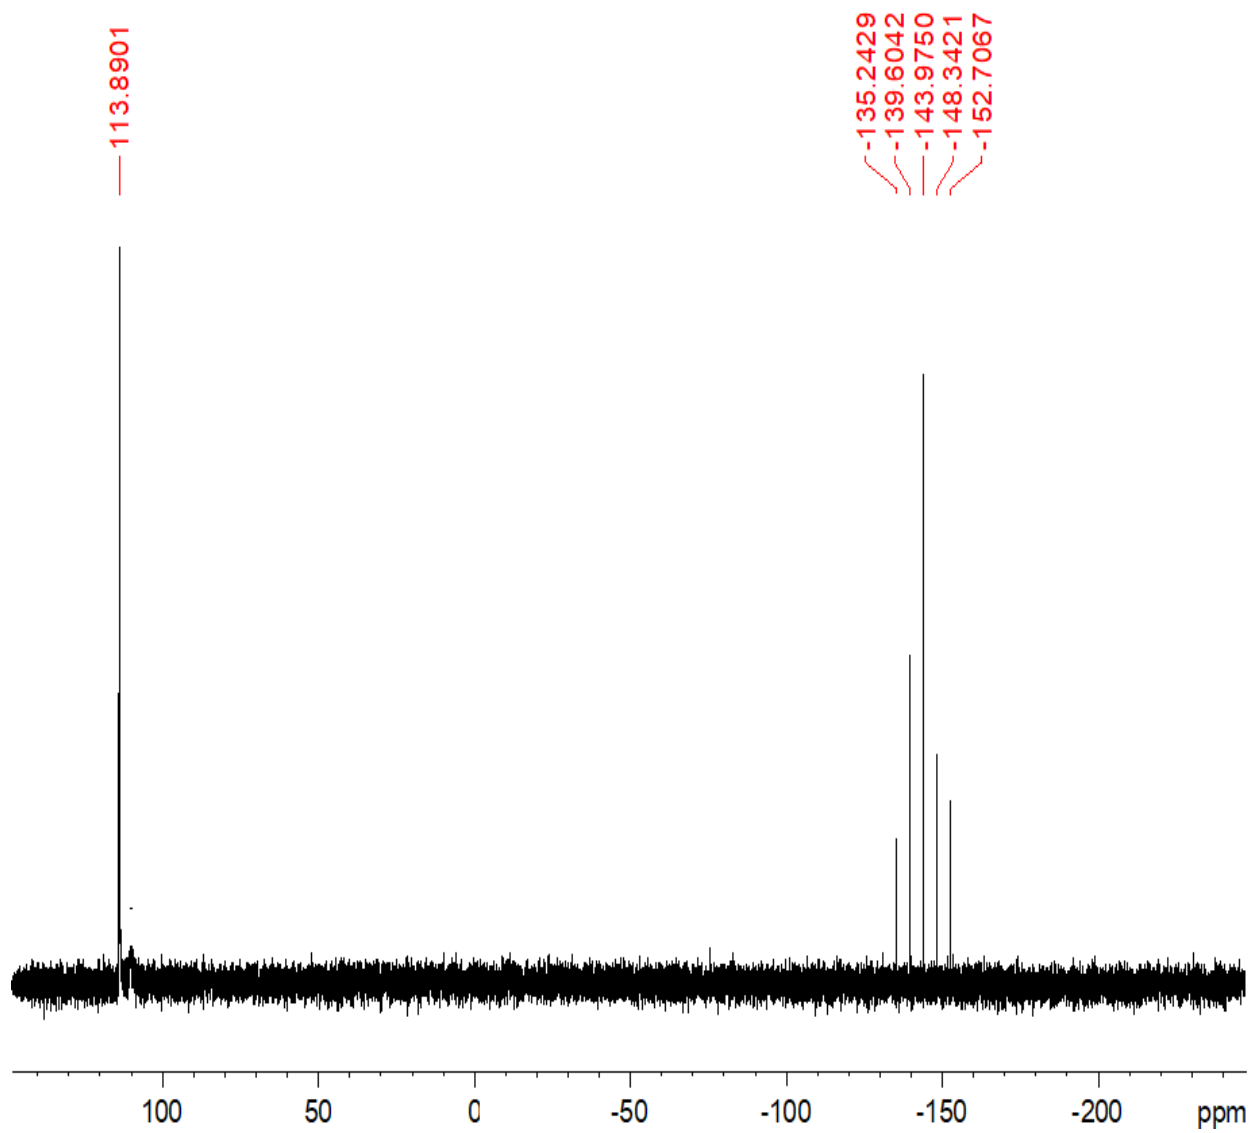

**Figure S25.**  $^{31}\text{P}\{^1\text{H}\}$  NMR spectrum of cluster **2a** in  $d_6$ -acetone.

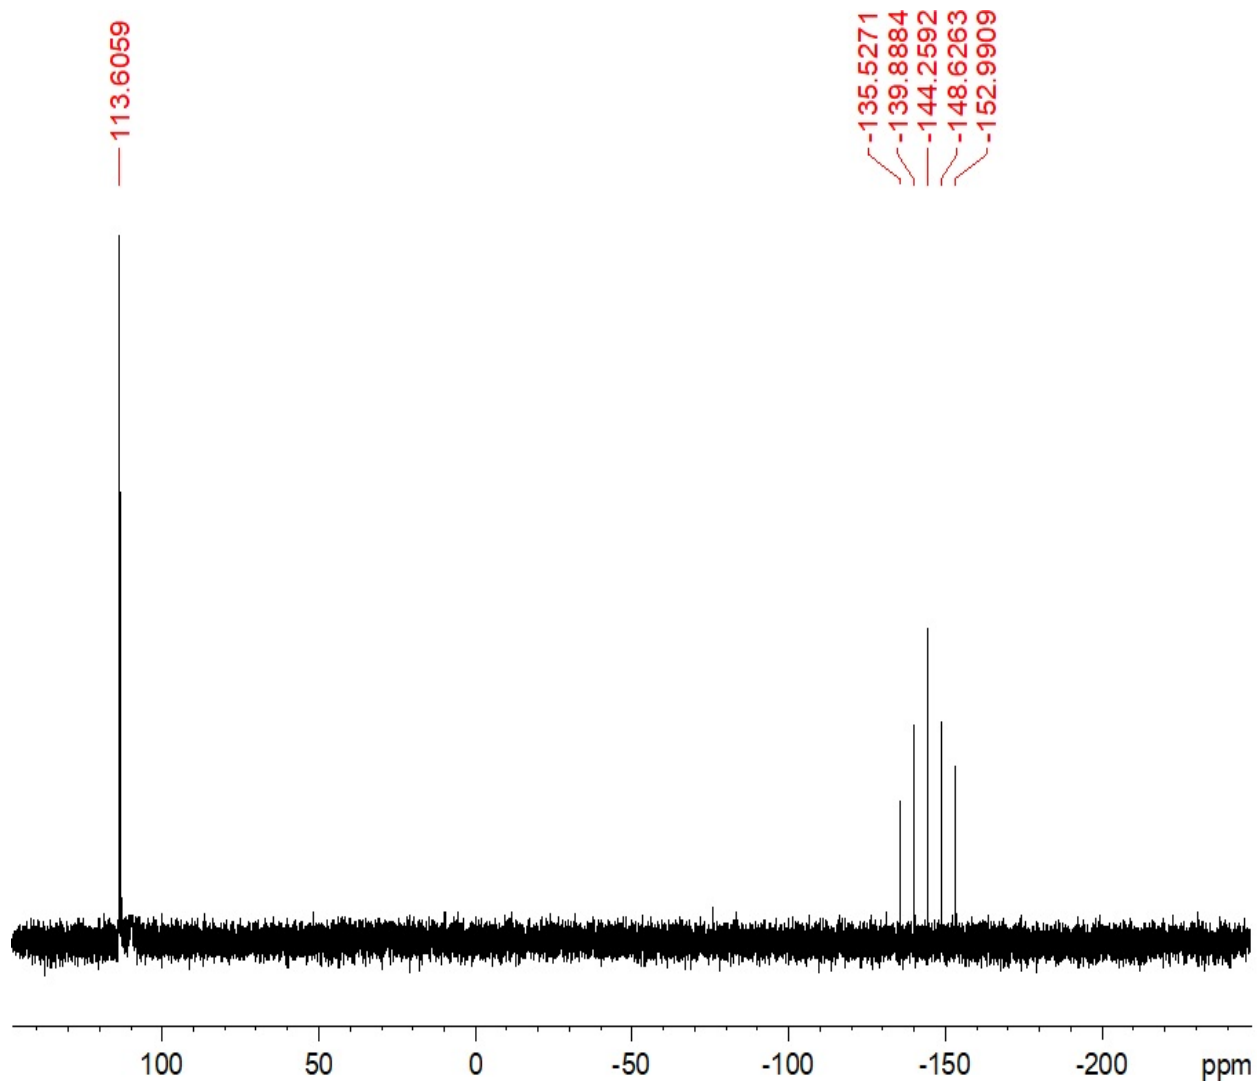

**Figure S26.**  $^{31}\text{P}\{^1\text{H}\}$  NMR spectrum of cluster **2b** in  $d_6$ -acetone.

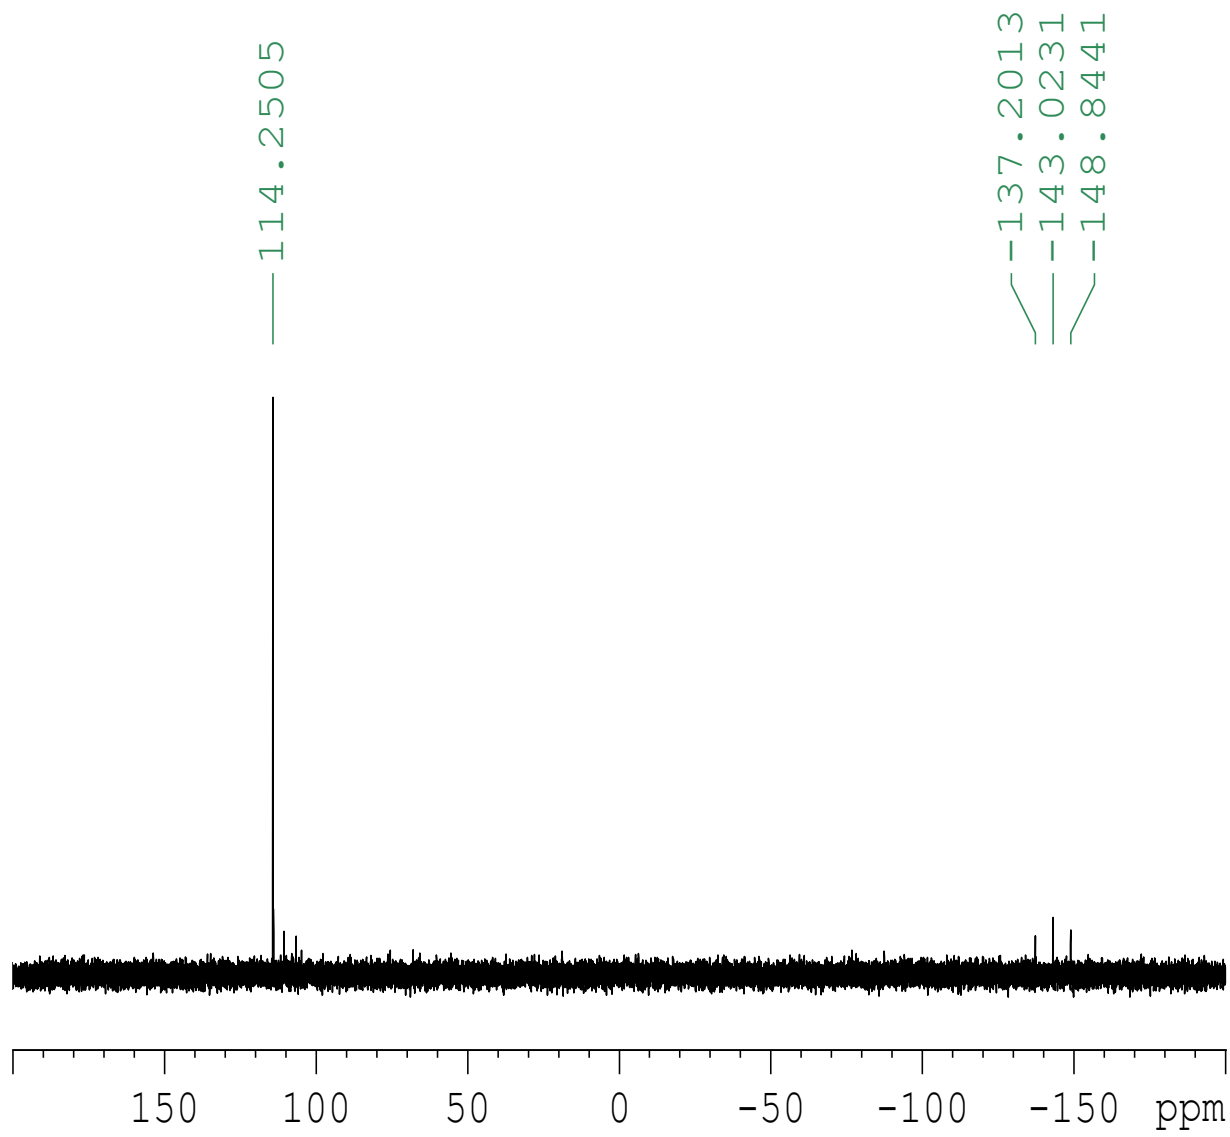

**Figure S27.**  $^{31}\text{P}\{^1\text{H}\}$  NMR spectrum of cluster **2c** in  $d_6$ -acetone.

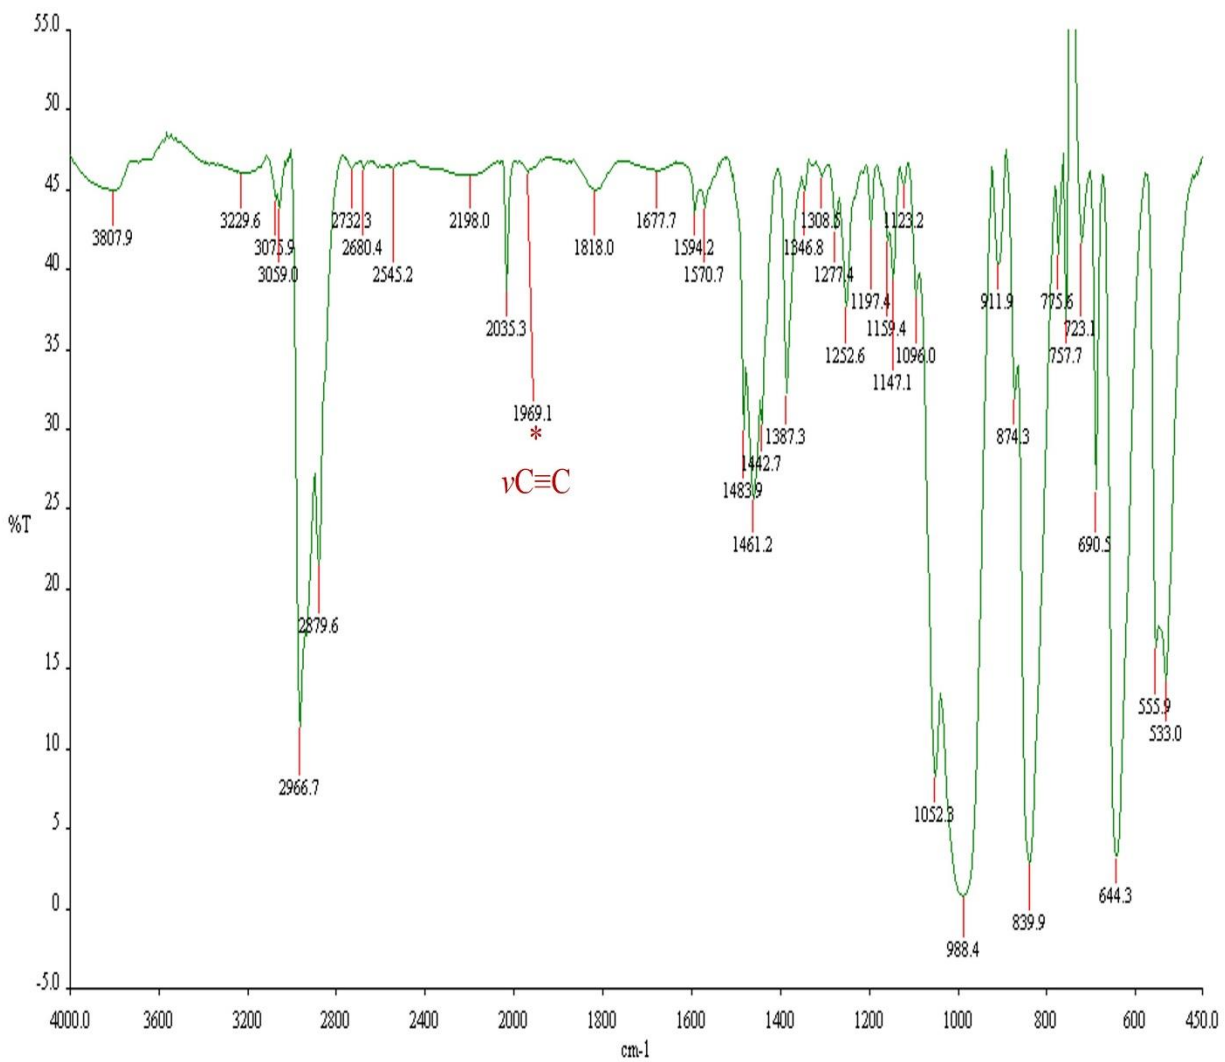

**Figure S28.** FT-IR spectrum of cluster **2a**.

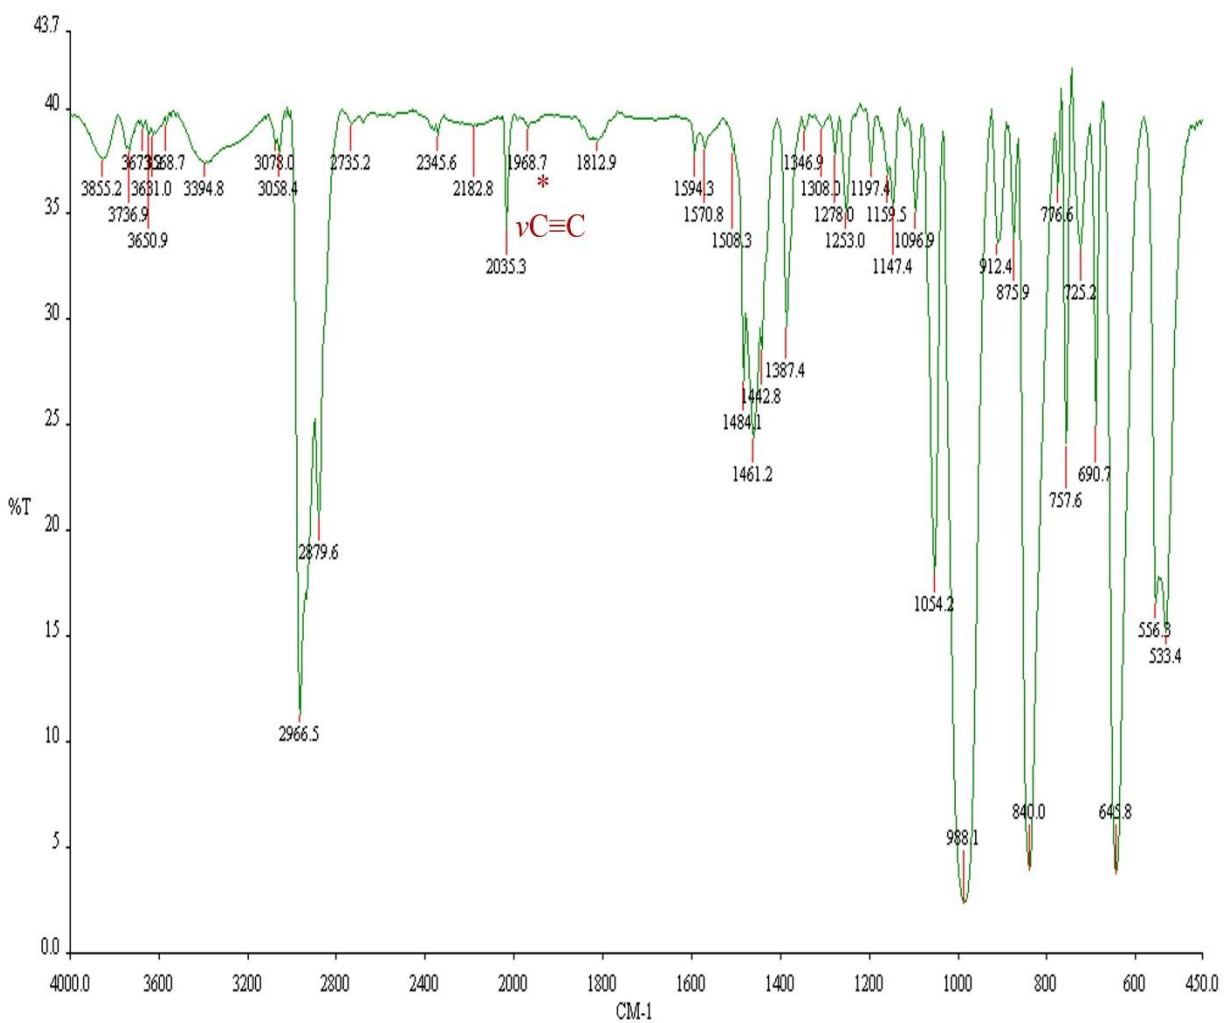

Figure S29. FT-IR spectrum of cluster 2b.

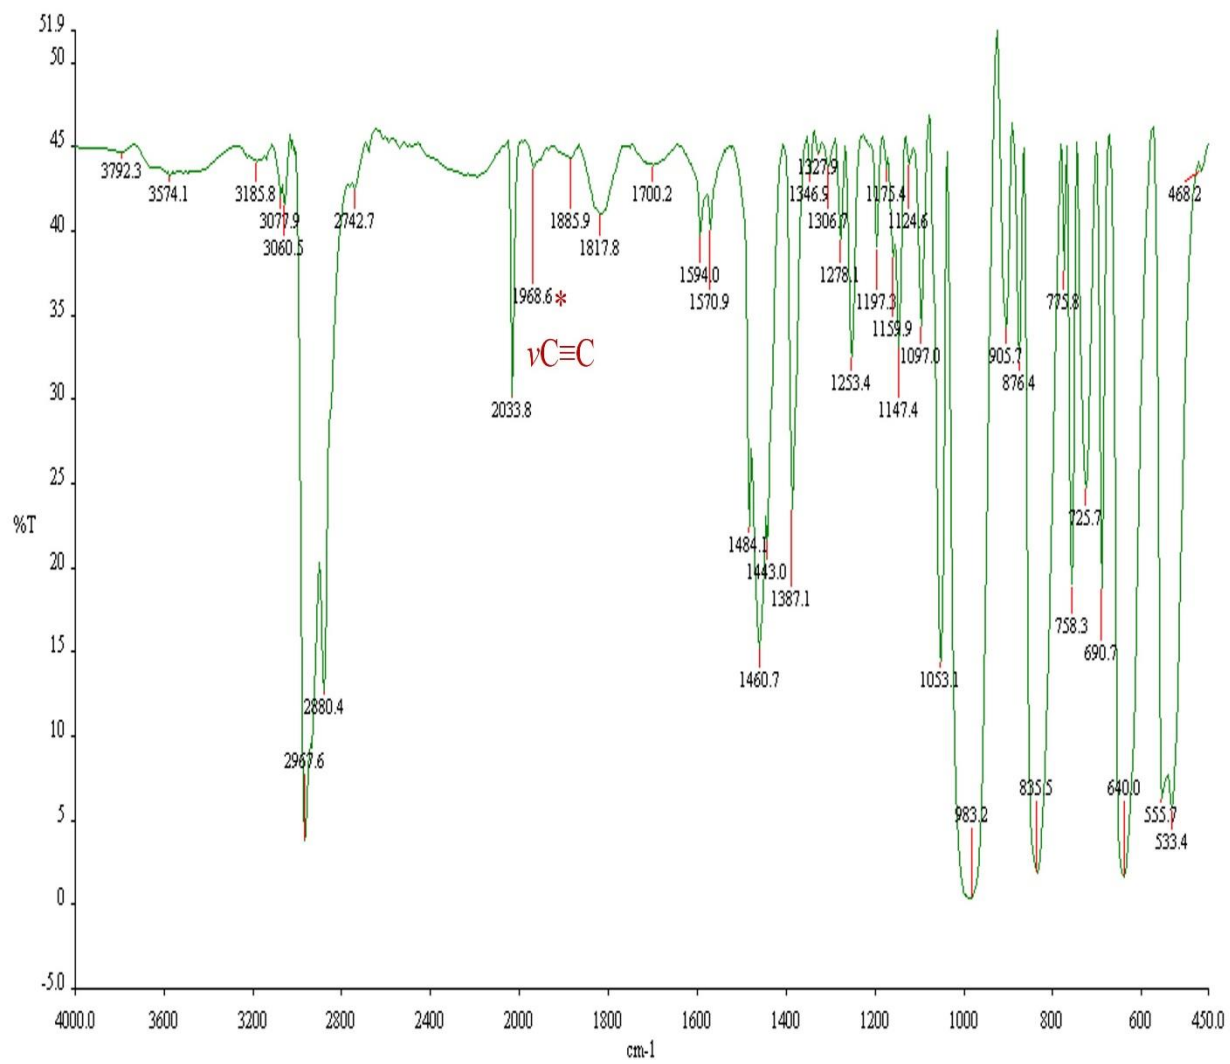

**Figure S30.** FT-IR spectrum of cluster **2c**.

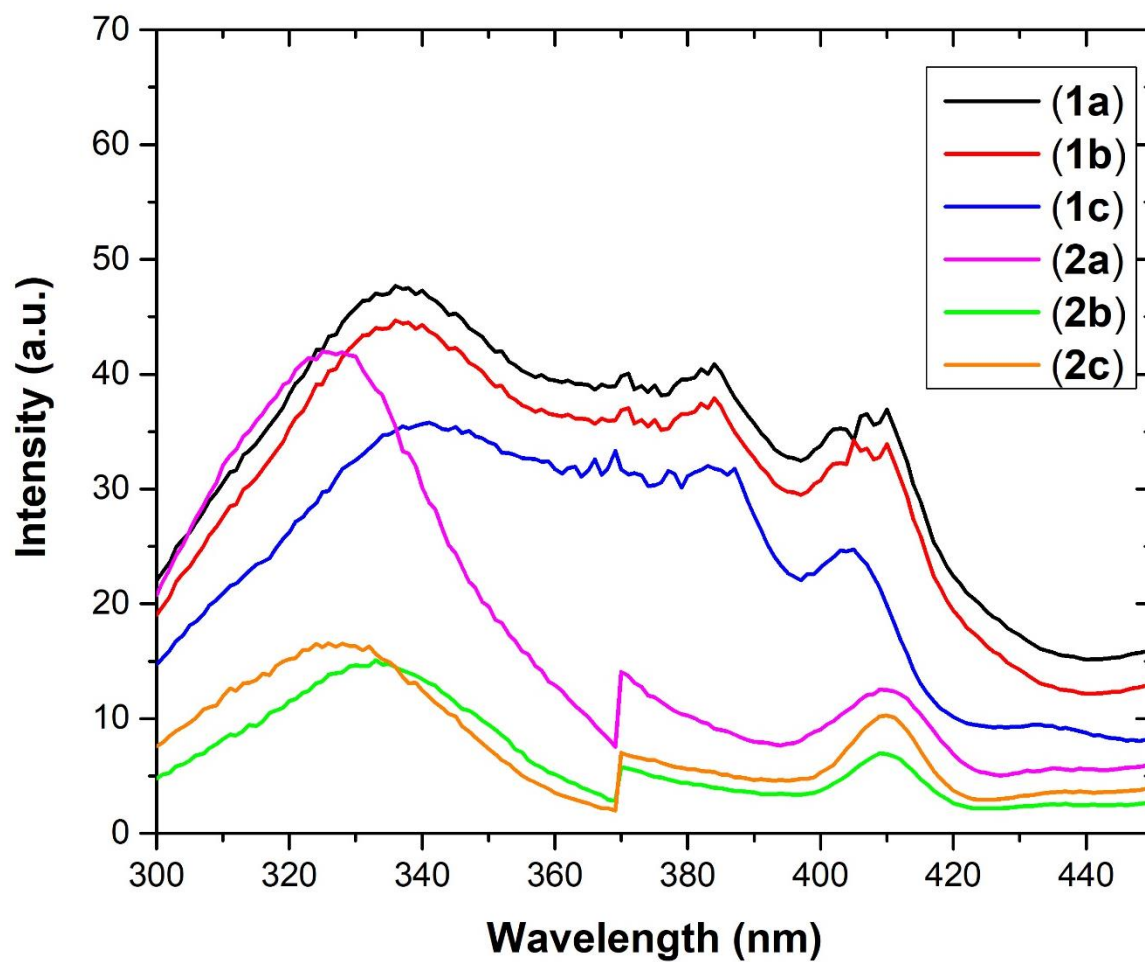

**Figure 31.** The excitation spectra of cluster **1a-c** and **2a-c** in 2-MeTHF at 77 K.



**Table S1.** Selected X-ray crystallographic data of **1a-c** and **2a-c**.

|                                                                                           | <b>1a</b>                                                                                                            | <b>1b</b>                                                                                                            | <b>1c</b>                                                                                                                                              | <b>2a</b>                                                                                                             | <b>2b</b>                                                                                                             | <b>2c</b>                                                                                                           |
|-------------------------------------------------------------------------------------------|----------------------------------------------------------------------------------------------------------------------|----------------------------------------------------------------------------------------------------------------------|--------------------------------------------------------------------------------------------------------------------------------------------------------|-----------------------------------------------------------------------------------------------------------------------|-----------------------------------------------------------------------------------------------------------------------|---------------------------------------------------------------------------------------------------------------------|
| CCDC number                                                                               | 2169261                                                                                                              | 2169262                                                                                                              | 2169263                                                                                                                                                | 2169264                                                                                                               | 2169265                                                                                                               | 2169266                                                                                                             |
| Empirical formula                                                                         | C <sub>68</sub> H <sub>104</sub> ClCu <sub>12</sub><br>F <sub>6</sub> O <sub>12</sub> P <sub>7</sub> S <sub>12</sub> | C <sub>68</sub> H <sub>104</sub> BrCu <sub>12</sub><br>F <sub>6</sub> O <sub>12</sub> P <sub>7</sub> S <sub>12</sub> | C <sub>68</sub> H <sub>104</sub> Cu <sub>12</sub> F <sub>6</sub><br>O <sub>13</sub> P <sub>7</sub> S <sub>12</sub> ·(CH <sub>3</sub> ) <sub>2</sub> CO | C <sub>68</sub> H <sub>104</sub> Ag <sub>12</sub> Cl<br>F <sub>6</sub> O <sub>12</sub> P <sub>7</sub> S <sub>12</sub> | C <sub>68</sub> H <sub>104</sub> Ag <sub>12</sub> Br<br>F <sub>6</sub> O <sub>12</sub> P <sub>7</sub> S <sub>12</sub> | C <sub>68</sub> H <sub>104</sub> Ag <sub>12</sub> F <sub>6</sub><br>IO <sub>12</sub> P <sub>7</sub> S <sub>12</sub> |
| Formula weight                                                                            | 2626.95                                                                                                              | 2671.41                                                                                                              | 2776.46                                                                                                                                                | 3268.99                                                                                                               | 3203.37                                                                                                               | 3250.36                                                                                                             |
| Temperature, K                                                                            | 150(2)                                                                                                               | 150(2)                                                                                                               | 150(2)                                                                                                                                                 | 150(2)                                                                                                                | 150(2)                                                                                                                | 150(2)                                                                                                              |
| Wavelength, Å                                                                             | 0.71073                                                                                                              | 0.71073                                                                                                              | 0.71073                                                                                                                                                | 0.71073                                                                                                               | 0.71073                                                                                                               | 0.71073                                                                                                             |
| Crystal system                                                                            | Monoclinic                                                                                                           | Monoclinic                                                                                                           | Triclinic                                                                                                                                              | Triclinic                                                                                                             | Triclinic                                                                                                             | Triclinic                                                                                                           |
| Space group                                                                               | <i>P</i> 2 <sub>1</sub> / <i>n</i>                                                                                   | <i>P</i> 2 <sub>1</sub> / <i>n</i>                                                                                   | <i>P</i> -1                                                                                                                                            | <i>P</i> -1                                                                                                           | <i>P</i> -1                                                                                                           | <i>P</i> -1                                                                                                         |
| <i>a</i> , Å                                                                              | 18.626(2)                                                                                                            | 18.6194(15)                                                                                                          | 16.7070(19)                                                                                                                                            | 21.3242(6)                                                                                                            | 21.4279(7)                                                                                                            | 21.4823(3)                                                                                                          |
| <i>b</i> , Å                                                                              | 23.462(3)                                                                                                            | 23.4762(18)                                                                                                          | 17.367(2)                                                                                                                                              | 22.8389(6)                                                                                                            | 22.7192(8)                                                                                                            | 22.6593(9)                                                                                                          |
| <i>c</i> , Å                                                                              | 22.637(3)                                                                                                            | 22.7144(18)                                                                                                          | 19.993(2)                                                                                                                                              | 23.6053(6)                                                                                                            | 23.7146(7)                                                                                                            | 23.8050(9)                                                                                                          |
| $\alpha$ , deg.                                                                           | 90                                                                                                                   | 90                                                                                                                   | 66.877(2)                                                                                                                                              | 79.8300(6)                                                                                                            | 99.8543(7)                                                                                                            | 99.8379(8)                                                                                                          |
| $\beta$ , deg.                                                                            | 90.394(3)                                                                                                            | 90.280(2)                                                                                                            | 83.253(2)                                                                                                                                              | 89.9697(6)                                                                                                            | 90.3872(7)                                                                                                            | 90.4695(9)                                                                                                          |
| $\gamma$ , deg.                                                                           | 90                                                                                                                   | 90                                                                                                                   | 71.002(2)                                                                                                                                              | 63.8667(6)                                                                                                            | 116.2836(7)                                                                                                           | 116.3596(8)                                                                                                         |
| Volume, Å <sup>3</sup>                                                                    | 9892.1(19)                                                                                                           | 9928.6(14)                                                                                                           | 5044.1(10)                                                                                                                                             | 10120.0(5)                                                                                                            | 10153.9(6)                                                                                                            | 10183.7(7)                                                                                                          |
| <i>Z</i>                                                                                  | 4                                                                                                                    | 4                                                                                                                    | 2                                                                                                                                                      | 4                                                                                                                     | 4                                                                                                                     | 4                                                                                                                   |
| Calculated density, Mg m <sup>-3</sup>                                                    | 1.764                                                                                                                | 1.787                                                                                                                | 1.828                                                                                                                                                  | 2.080                                                                                                                 | 2.095                                                                                                                 | 2.120                                                                                                               |
| Absorption coefficient, mm <sup>-1</sup>                                                  | 2.978                                                                                                                | 3.342                                                                                                                | 3.202                                                                                                                                                  | 2.712                                                                                                                 | 3.070                                                                                                                 | 2.971                                                                                                               |
| Crystal size, mm <sup>3</sup>                                                             | 0.30x0.17x0.10                                                                                                       | 0.10x0.07x0.05                                                                                                       | 0.20x0.12x0.04                                                                                                                                         | 0.25x0.24x0.07                                                                                                        | 0.25x0.16x0.05                                                                                                        | 0.25x0.13x0.10                                                                                                      |
| $\theta_{\max}$ , deg.                                                                    | 27.143                                                                                                               | 25.000                                                                                                               | 24.999                                                                                                                                                 | 27.154                                                                                                                | 24.999                                                                                                                | 25.000                                                                                                              |
| Reflections collected / unique                                                            | 123710/21882<br>[ <i>R</i> <sub>int</sub> = 0.0372]                                                                  | 58959/17453<br>[ <i>R</i> <sub>int</sub> =0.0367]                                                                    | 32764/17534<br>[ <i>R</i> <sub>int</sub> = 0.0242]                                                                                                     | 80345/43760<br>[ <i>R</i> <sub>int</sub> = 0.0171]                                                                    | 60899/35292<br>[ <i>R</i> <sub>int</sub> = 0.0196]                                                                    | 75557/35369<br>[ <i>R</i> <sub>int</sub> = 0.0208]                                                                  |
| Completeness, %                                                                           | 100                                                                                                                  | 99.9                                                                                                                 | 98.6                                                                                                                                                   | 98.6                                                                                                                  | 98.7                                                                                                                  | 98.6                                                                                                                |
| restraints / parameters                                                                   | 469/1079                                                                                                             | 523/1111                                                                                                             | 134/1171                                                                                                                                               | 922/2212                                                                                                              | 1053/2237                                                                                                             | 929/2219                                                                                                            |
| GOF                                                                                       | 1.038                                                                                                                | 1.015                                                                                                                | 1.026                                                                                                                                                  | 1.022                                                                                                                 | 1.017                                                                                                                 | 1.047                                                                                                               |
| <sup>a</sup> <i>R</i> 1, <sup>b</sup> <i>wR</i> 2<br>[ <i>I</i> >2 $\sigma$ ( <i>I</i> )] | <i>R</i> 1 = 0.0302,<br><i>wR</i> 2 = 0.0704                                                                         | <i>R</i> 1 = 0.0310,<br><i>wR</i> 2 = 0.0680                                                                         | <i>R</i> 1 = 0.0612,<br><i>wR</i> 2 = 0.1743                                                                                                           | <i>R</i> 1 = 0.0325,<br><i>wR</i> 2 = 0.0762                                                                          | <i>R</i> 1 = 0.0350,<br><i>wR</i> 2 = 0.0931                                                                          | <i>R</i> 1 = 0.0415,<br><i>wR</i> 2 = 0.1023                                                                        |
| <sup>a</sup> <i>R</i> 1, <sup>b</sup> <i>wR</i> 2 (all data)                              | <i>R</i> 1 = 0.0366,<br><i>wR</i> 2 = 0.0740                                                                         | <i>R</i> 1 = 0.0460,<br><i>wR</i> 2 = 0.0750                                                                         | <i>R</i> 1 = 0.0784,<br><i>wR</i> 2 = 0.1933                                                                                                           | <i>R</i> 1 = 0.0404,<br><i>wR</i> 2 = 0.0816                                                                          | <i>R</i> 2 = 0.0438,<br><i>wR</i> 2 = 0.1002                                                                          | <i>R</i> 1 = 0.0496,<br><i>wR</i> 2 = 0.1103                                                                        |
| Largest diff. peak / hole, e Å <sup>-3</sup>                                              | 1.228/-1.460                                                                                                         | 1.043/-0.796                                                                                                         | 2.710/-0.872                                                                                                                                           | 2.131/-1.783                                                                                                          | 1.924/-1.529                                                                                                          | 2.389/-2.226                                                                                                        |

$$^a R1 = \frac{\sum | | F_o | - | F_c | |}{\sum | F_o |} \quad ^b wR2 = \{ \frac{\sum [w(F_o^2 - F_c^2)^2]}{\sum [w(F_o^2)^2]} \}^{1/2}$$
